# Supplementary material for: Regioselective dehydration of α-hydroxymethyl tetrahydrofurans using Burgess’ reagent under microwave irradiation
Source: Royal Society of Chemistry journal article supplement (doi:10.1039/c7ob00607a), 2017-01-01

*Supporting Information*

**Dehydration of  $\alpha$ -Hydroxymethyl Tetrahydrofurans using Burgess' Reagent under Microwave Irradiation**

Leona J. Gross and Christian B. W. Stark\*

Fachbereich Chemie, Institut für Organische Chemie, Universität Hamburg, Martin-Luther-King Platz  
6, 20146 Hamburg, Germany

**Table of Contents**

1. General Information
2. Syntheses of 2-Vinyl-THF-Products
3.  $^1\text{H}$  and  $^{13}\text{C}$  NMR Spectra

**1. General Information**

All reactions were carried out in oven dried 10 mL microwave reaction vials that were sealed with a septum under normal atmosphere. Chemicals were purchased from *Acros* and *Sigma Aldrich* and used without further purification. The substrates that were employed to the dehydration were prepared according to the literature processes and are not described further in the experimental part.<sup>1,2</sup>

The dehydration was carried out in a microwave reactor of the type CEM Discover LabMate. The reaction vial was irradiated for 1 minute with 150 W to heat the reaction mixture to 150 °C. The reaction was carried out for 3 minutes at this temperature whilst being continuously stirred.

All products were purified via flash column chromatography using silica gel (*Fluka* 60 Å, 230-400 mesh). Thin layer chromatography was carried out using Merck Silica Gel F254 plates. The compounds were visualized using UV light or potassium permanganate stain. Concentration of the eluent under reduced pressure was performed by rotary evaporation at 40 °C water bath temperature at the appropriate pressure.

GC-MS analysis was performed on an Agilent 6890N GC interfaced to an Agilent 5975B VL MSD mass selective detector (30 m x 0.25 mm capillary column, HP5-ms) using helium as carrier gas.

NMR spectra were recorded on a Bruker Avance-600 (600 MHz), Bruker Avance-400 (400 MHz) or Bruker F-300 (300 MHz) instrument at ambient temperature using  $\text{CDCl}_3$  as the solvent. Chemical shifts ( $\delta$ ) are reported in ppm with the solvent resonance as the internal standard relative to  $\text{CHCl}_3$  ( $\delta$  7.26 ppm for  $^1\text{H}$  and 77.0 ppm for  $^{13}\text{C}$ ). Coupling constants are reported in Hz.

IR (Infrared) data were obtained on a ATR-FT-IR spectrometer of the type Alpha-P from Bruker with only major peaks being reported.

Mass spectra were recorded on an Agilent 6224 ESI-TOF mass spectrometer.

Melting points (MP) were measured with a Büchi Melting Point M-565 and are uncorrected.

<sup>1</sup> Göhler, S.; Roth, S.; Cheng, H.; Göksel, H.; Rupp, A.; Haustedt, L. O.; Stark, C. B. W. *Synthesis* **2007**, 17, 2751–2754.

<sup>2</sup> Roth, S.; Göhler, S.; Cheng, H.; Stark, C. B. W. *Eur. J. Chem.* **2005**, 19, 4109–4118.

## 2. Syntheses of 2-Vinyl-THF-Products

### 2.1 General Procedure for Dehydration using Burgess' Reagent under Microwave Irradiation

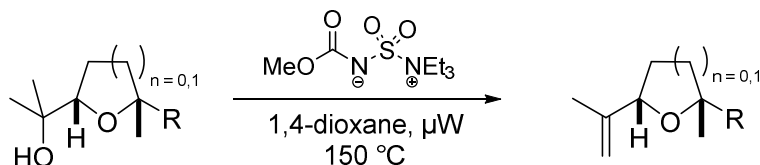

The respective alcohol (200  $\mu$ mol) was dissolved in 1,4-dioxane (1.0 mL). Burgess' reagent (96.0 mg, 400  $\mu$ mol) was added, the reaction vial was sealed with a septum and submitted to the microwave reactor. The reaction mixture was irradiated for 1 minute with a capacity of 150 W to reach a temperature of 150  $^{\circ}$ C. The reaction was stirred for 3 minutes at this temperature and then cooled down to ambient temperature. The reaction mixture was directly subjected to silica gel flash chromatography using petroleum ether/EtOAc (using the solvent composition or gradient indicated) for purification of the crude product.

### 2.2 Analytical Data of Dehydration Products

#### (*R*)-2-Benzoyl-2-((2*R*, 5*S*)-5-(prop-1-en-2-yl)-2-(methyl)-tetrahydrofuran-2-yl)-ethylbenzoate (**13a**)

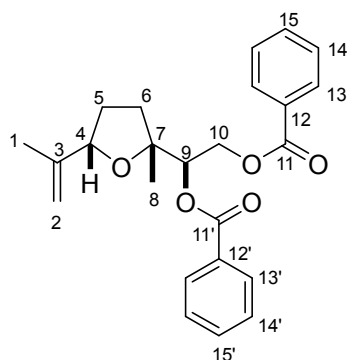

synthesized according to general procedure: 48.1 mg (122  $\mu$ mol, 61%) were isolated (eluent: petroleum ether/EtOAc 98:2  $\rightarrow$  80:20) as a colorless solid.

**R<sub>f</sub>** - value (PE/EE, 90:10): 0.44.

**MP**: 80.2-83.5  $^{\circ}$ C.

**<sup>1</sup>H-NMR** (300 MHz, CDCl<sub>3</sub>):  $\delta$  = 8.12-8.03 (m, 2H, H-13), 7.96-7.88 (m, 2H, H-13'), 7.60-7.30 (m, 6H, H-15, H-15', H-14, H-14'), 5.62 (dd, 1H, *J* = 8.8, 2.7 Hz, H-9), 5.11 (s, br, 1H, H-2a), 4.86 (s, br, 1H, H-2b), 4.84-4.76 (m, 1H, H-10a), 4.58 (dd, 1H, *J* = 11.9, 8.8 Hz, H-10b), 4.41 (t, 1H, *J* = 7.1 Hz, H-4), 2.26-1.99 (m, 2H, H-6a, H-5a), 1.87-1.70 (m, 5H, H-5b, H-1, H-6b), 1.45 (s, 3H, H-8).

**<sup>13</sup>C-NMR** (75 MHz, CDCl<sub>3</sub>):  $\delta$  = 166.6 (C-11), 166.2 (C-11'), 144.9 (C-3), 133.2 (C-12), 133.1 (C-12'), 130.1 (C-14), 129.9 (C-15), 129.8 (C-15'), 128.5 (C-13), 128.4 (C-13'), 110.8 (C-2), 83.1 (C-7), 82.1 (C-4), 76.7 (C-9), 64.3 (C-10), 35.6 (C-6), 31.9 (C-5), 24.7 (C-8), 18.4 (C-1).

**IR** (ATR):  $\tilde{\nu}$  = 3069 (w), 2971 (w), 1718 (s), 1450 (m), 1259 (s), 1095 (s), 1068 (s), 1025 (s), 707 (s).

**HRMS** (ESI-TOF) *m/z*: [M+Na]<sup>+</sup> calculated for C<sub>24</sub>H<sub>26</sub>O<sub>5</sub>Na: 417.1678, found 417.1701.

**(R)-2-Benzoyl-2-((2R)-5-(prop-2-yliden)-2-(methyl)-tetrahydrofuran-2-yl)-ethylbenzoate (13b)**

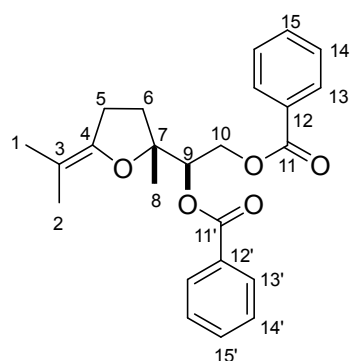

synthesized according to general procedure: 6.00 mg (15.1  $\mu$ mol, 7%) were isolated (eluent: petroleum ether/EtOAc 98:2  $\rightarrow$  80:20) as a colorless oil.

**R<sub>f</sub>** - value (PE/EE, 90:10): 0.29.

**<sup>1</sup>H-NMR** (300 MHz, CDCl<sub>3</sub>):  $\delta$  = 8.09-8.01 (m, 2H, H-13), 7.98-7.89 (m, 2H, H-13'), 7.62-7.31 (m, 6H, H-15, H-15', H-14, H-14'), 5.61 (dd, 1H,  $J$  = 8.6, 2.9 Hz, H-9), 4.78-4.73 (m, 1H, H-10a), 4.52 (dd, 1H,  $J$  = 11.9, 8.6 Hz, H-10b), 2.55 (tt, 2H,  $J$  = 8.0, 1.8 Hz, H-5), 2.22-2.10 (m, 1H, H-6a), 1.92-1.77 (m, 1H, H-6b), 1.64 (d, 3H,  $J$  = 1.1 Hz, H-1), 1.56 (s, 3H, H-2), 1.46 (s, 3H, H-8).

**<sup>13</sup>C-NMR** (75 MHz, CDCl<sub>3</sub>):  $\delta$  = 166.7 (C-11), 166.0 (C-11'), 148.5 (C-4), 133.3 (C-12), 133.2 (C-12'), 130.0 (C-15), 129.8 (C-15'), 129.5 (C-13), 128.6 (C-13'), 126.7 (C-14), 126.6 (C-14'), 98.5 (C-3), 84.3 (C-7), 76.4 (C-9), 64.0 (C-10), 33.8 (C-6), 26.5 (C-5), 23.9 (C-8), 19.1 (C-2), 16.8 (C-1).

**IR** (ATR):  $\tilde{\nu}$  = 2974 (w), 1705 (m), 1453 (m), 1265 (s), 1212 (s), 1172 (s), 1126 (s), 967 (m), 929 (m), 710 (s).

**HRMS** (ESI-TOF)  $m/z$ : [M+H]<sup>+</sup> calculated for C<sub>24</sub>H<sub>27</sub>O<sub>5</sub>: 395.1853, found 395.1891.

**(R)-4-Acetoxy-4-((2R, 5S)-5-(propen-1-en-2-yl)-2-(methyl)-tetrahydrofuran-2-yl)-but-1-en (15)**

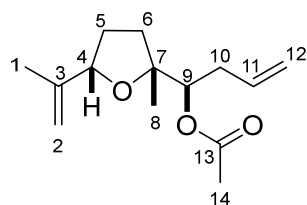

synthesized according to general procedure: 35.3 mg (150  $\mu$ mol, 68%) were isolated (eluent: petroleum ether/EtOAc 95:5) as a colorless oil.

**R<sub>f</sub>** - value (PE/EE, 95:5): 0.22.

**<sup>1</sup>H-NMR** (400 MHz, CDCl<sub>3</sub>):  $\delta$  = 5.75 (dddd, 1H  $J$  = 17.0, 10.1, 8.1, 6.0 Hz, H-11), 5.11-4.96 (m, 4H, H-9, H-2a, H-12), 4.81 (s, 1H, H-2b), 4.37 (dd, 1H,  $J$  = 8.2, 6.1 Hz, H-4), 2.51-2.40 (m, 1H, H-10a), 2.36-2.24 (m, 1H, H-10b), 2.10-1.88 (m, 5H, H-14, H-5a, H-6a), 1.78-1.62 (m, 5H, H-1, H-5b, H-6b), 1.25 (s, 3H, H-8).

**<sup>13</sup>C-NMR** (100 MHz, CDCl<sub>3</sub>):  $\delta$  = 170.8 (C-13), 145.2 (C-3), 134.8 (C-11), 117.4 (C-12), 110.8 (C-2), 83.9 (C-7), 81.9 (C-4), 77.6 (C-9), 35.3 (C-10), 35.2 (C-6), 31.7 (C-5), 23.5 (C-1), 21.3 (C-14), 18.2 (C-8).

**IR** (ATR):  $\tilde{\nu}$  = 3078 (w), 2973 (w), 1737 (s), 1371 (m), 1234 (s), 1023 (s), 911 (m).

**HRMS** (ESI-TOF)  $m/z$ : [M+Na]<sup>+</sup> calculated for C<sub>14</sub>H<sub>22</sub>O<sub>3</sub>Na: 261.1461, found 261.1444.

**(S)-4-Acetoxy-4-((2R, 5S)-5-(prop-1-en-2-yl)-2-(methyl)-tetrahydrofuran-2-yl)-1-iod-ethan (17)**

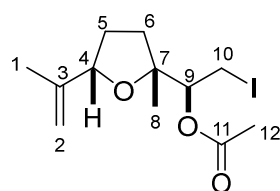

synthesized according to general procedure: 17.3 mg (51.2  $\mu$ mol, 61%) were isolated (eluent: petroleum ether/EtOAc 95:5) as a colorless oil.

**R<sub>f</sub> - value** (PE/EE, 90:10): 0.23.

**<sup>1</sup>H-NMR** (400 MHz, CDCl<sub>3</sub>):  $\delta$  = 5.21 (dd, 1H, J = 10.8, 2.4 Hz, H-9), 5.02 (s, 1H, H-2a), 4.83 (s, 1H, H-2b), 4.35 (t, 1H, J = 7.1 Hz, H-4), 3.52 (dd, 1H, J = 10.8, 2.4 Hz, H-10a), 3.28 (t, 1H, J = 10.8 Hz, H-10b), 2.15 (s, 3H, H-11), 2.06-1.95 (m, 2H, H-5a, H-6a), 1.75-1.64 (m, 5H, H-1, H-5b, H-6b), 1.27 (s, 3H, H-8).

**<sup>13</sup>C-NMR** (100 MHz, CDCl<sub>3</sub>):  $\delta$  = 207.1 (C-11), 144.7 (C-3), 111.1 (C-2), 84.1 (C-7), 82.1 (C-4), 78.4 (C-9), 35.3 (C-6), 31.7 (C-5), 24.5 (C-8), 21.2 (C-11), 18.2 (C-1), 3.9 (C-10).

**IR** (ATR):  $\tilde{\nu}$  = 2970 (m), 2926 (m), 2854 (w), 1746 (s), 1451 (w), 1372 (m), 1232 (s), 1069 (m), 1021 (m), 901 (w).

**MS** (EI-TOF)  $m/z$ : calculated for C<sub>8</sub>H<sub>13</sub>O (M-C<sub>4</sub>H<sub>6</sub>IO<sub>2</sub>)<sup>+</sup> 125.0966, found 125.09; calculated for C<sub>10</sub>H<sub>16</sub>IO (M-C<sub>2</sub>H<sub>3</sub>O<sub>2</sub>)<sup>+</sup> 279.0246, found 279.14.

**(2R, 5S)-2-((Methansulfonyl)oxymethyl)-2-methyl-5-(prop-1-en-2-yl)tetrahydrofuran (19)**

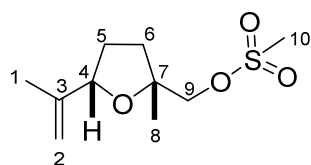

synthesized according to general procedure: 11.1 mg (47.4  $\mu$ mol, 94%) were isolated (eluent: petroleum ether/EtOAc 80:20) as a colorless oil.

**R<sub>f</sub> - value** (PE/EE, 80:20): 0.38.

**<sup>1</sup>H-NMR** (600 MHz, CDCl<sub>3</sub>):  $\delta$  = 5.01 (s, 1H, H-2a), 4.82 (s, 1H, H-2b), 4.42 (t, 1H, J = 7.1 Hz, H-4), 4.12-4.03 (m, 2H, H-9), 3.04 (s, 3H, H-10), 2.13-2.03 (m, 2H, H-5a, H-6a), 1.85-1.69 (m, 5H, H-5b, H-6b, H-1), 1.33 (s, 3H, H-8).

**<sup>13</sup>C-NMR** (125 MHz, CDCl<sub>3</sub>):  $\delta$  = 144.9 (C-3), 110.9 (C-2), 82.6 (C-4), 81.2 (C-7), 74.4 (C-9), 37.6 (C-10), 34.9 (C-6), 31.3 (C-5), 24.1 (C-8), 18.2 (C-1).

**IR** (ATR):  $\tilde{\nu}$  = 2922 (m), 2852 (w), 1722 (s), 1409 (m), 1263 (m), 1175 (s), 1100 (m), 965 (m), 729 (m), 529 (m).

**HRMS** (ESI-TOF)  $m/z$ : [M+H]<sup>+</sup> calculated for C<sub>10</sub>H<sub>19</sub>O<sub>4</sub>S: 235.0999, found 235.0955.

**(2R, 5S)-2-(Benzoyloxymethyl)-2-methyl-5-(prop-1-en-2-yl)tetrahydrofuran (21)**

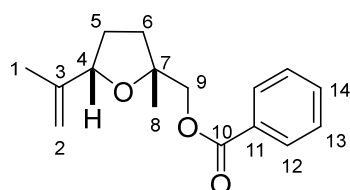

synthesized according to general procedure: 29.0 mg (111  $\mu$ mol, 67%) were isolated (eluent: petroleum ether/EtOAc 80:20) as a colorless oil.

**R<sub>f</sub> - value** (PE/EE, 95:5): 0.49.

**<sup>1</sup>H-NMR** (400 MHz, CDCl<sub>3</sub>): δ = 8.05 (dd, 2H, *J* = 8.3, 1.4 Hz, H-13), 7.60-7.52 (m, 1H, H-14), 7.44 (dd, 2H, *J* = 8.3, 7.0 Hz, H-12), 5.05 (s, 1H, H-2a), 4.80 (s, 1H, H-2b), 4.45 (dd, 1H, *J* = 7.9, 5.8 Hz, H-4), 4.34-4.26 (m, 1H, H-9a), 4.24-4.17 (m, 1H, H-9b), 2.16-2.07 (m, 2H, H-5a, H-6a), 1.89-1.77 (m, 2H, H-5b, H-6b), 1.72 (s, 3H, H-1), 1.39 (s, 3H, H-8).

**<sup>13</sup>C-NMR** (100 MHz, CDCl<sub>3</sub>): δ = 166.6 (C-10), 145.4 (C-11), 133.1 (C-14), 130.3 (C-3), 129.8 (C-13), 128.5 (C-12), 110.6 (C-2), 82.5 (C-4), 81.8 (C-7), 70.2 (C-9), 35.2 (C-6), 31.6 (C-5), 24.6 (C-8), 18.2 (C-1).

**IR** (ATR):  $\tilde{\nu}$  = 2972 (m), 2872 (w), 1718 (s), 1451 (m), 1271 (s), 1249 (m), 1110 (s), 1069 (m), 1026 (m), 897 (m), 710 (s).

**HRMS** (ESI-TOF) *m/z*: [M+H]<sup>+</sup> calculated for C<sub>16</sub>H<sub>20</sub>NaO<sub>3</sub>: 283.1305, found 283.1309.

**(*S*)-3-((2*S*, 5*R*)-5-(prop-1-en-2-yl)-2-methyltetrahydrofuran-2-yl)isochroman-1-on (23)**

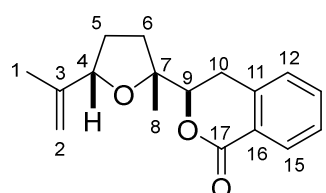

synthesized according to general procedure: 17.8 mg (65.4 μmol, 95%) were isolated (eluent: petroleum ether/EtOAc 90:10) as a colorless oil.

**R<sub>f</sub> - value** (PE/EE, 90:10): 0.20.

**<sup>1</sup>H-NMR** (600 MHz, CDCl<sub>3</sub>): δ = 8.09 (dd, 1H, *J* = 7.9, 1.4 Hz, H-15), 7.53 (td, 1H, *J* = 7.5, 1.4 Hz, H-13), 7.41-7.35 (m, 1H, H-14), 7.29-7.26 (m, 1H, H-12), 5.02 (s, 1H, H-2a), 4.83 (s, 1H, H-2b), 4.47-4.39 (m, 2H, H-4, H-9), 3.18 (dd, 1H, *J* = 16.2, 12.7 Hz, H-10a), 3.00 (dd, 1H, *J* = 16.2, 2.9 Hz, H-10b), 2.37 (ddd, 1H, *J* = 12.3, 8.8, 2.9 Hz, H-6a), 2.11-2.04 (m, 1H, H-5a), 1.95-1.86 (m, 1H, H-5b), 1.86-1.78 (m, 1H, H-6b), 1.75 (s, 3H, H-1), 1.41 (s, 3H, H-8).

**<sup>13</sup>C-NMR** (125 MHz, CDCl<sub>3</sub>): δ = 165.5 (C-17), 144.9 (C-3), 139.6 (C-16), 133.9 (C-13), 130.4 (C-15), 127.8 (C-12), 127.7 (C-14), 125.2 (C-11), 111.1 (C-2), 83.4 (C-9), 83.0 (C-7), 82.4 (C-4), 34.6 (C-6), 32.1 (C-5), 28.5 (C-10), 25.0 (C-8), 18.2 (C-1).

**IR** (ATR):  $\tilde{\nu}$  = 2970 (m), 2925 (m), 1728 (s), 1608 (w), 1460 (m), 1276 (m), 1232 (m), 1121 (m), 1089 (m), 1030 (m), 900 (w), 744 (m).

**HRMS** (ESI-TOF) *m/z*: [M+H]<sup>+</sup> calculated for C<sub>17</sub>H<sub>21</sub>O<sub>3</sub>: 273.1485, found 273.1512.

**(2*R*, 5*R*, 8*R*, 9*R*)-2-(Prop-1-en-2-yl)-8-(4-methoxyphenyl)-9-methyl-1-oxaspiro[4.5]decan-6-on (25)**

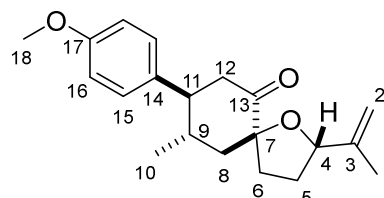

synthesized according to general procedure: 10.2 mg (32.4 μmol, 83%) were isolated (eluent: petroleum ether/EtOAc 90:10) as a colorless oil.

**R<sub>f</sub> - value** (PE/EE, 90:10): 0.28.

**<sup>1</sup>H-NMR** (600 MHz, CDCl<sub>3</sub>): δ = 7.12 (d, 2H, *J* = 8.6 Hz, H-15), 6.85 (d, 2H, *J* = 8.7 Hz, H-16), 4.96 (s, 1H, H-2a), 4.81 (s, 1H, H-2b), 4.48 (dd, 1H, *J* = 10.0, 5.8 Hz, H-4), 3.80 (s, 3H, H-18), 3.25-3.11 (m, 1H, H-12a), 2.66 (ddd, 1H, *J* = 12.3, 7.4, 2.1 Hz, H-6a), 2.45-2.33 (m, 3H, H-9, H-12b, H-11),

2.11 (dd, 1H,  $J = 14.3, 3.0$  Hz, H-8a), 2.00 (dddd, 1H,  $J = 12.7, 7.5, 5.9, 2.1$  Hz, H-5a), 1.78-1.67 (m, 1H, H-5b), 1.64 (s, 3H, H-1), 1.52-1.44 (m, 2H, H-6b, H-8b), 0.70 (d, 3H,  $J = 5.6$  Hz, H-10).

**$^{13}\text{C}$ -NMR** (125 MHz,  $\text{CDCl}_3$ ):  $\delta = 209.3$  (C-13), 158.4 (C-17), 145.1 (C-3), 135.8 (C-14), 128.4 (C-15), 114.1 (C-16), 111.1 (C-2), 87.6 (C-7), 84.1 (C-4), 55.4 (C-18), 52.0 (C-11), 47.5 (C-8), 46.5 (C-12), 33.9 (C-9), 31.8 (C-6), 31.5 (C-5), 19.2 (C-10), 17.7 (C-1).

**IR** (ATR):  $\tilde{\nu} = 2954$  (m), 2924 (m), 1720 (s), 1612 (w), 1513 (s), 1457 (m), 1254 (s), 1177 (m), 1037 (m), 831 (m).

**HRMS** (ESI-TOF)  $m/z$ :  $[\text{M}+\text{H}]^+$  calculated for  $\text{C}_{20}\text{H}_{27}\text{O}_3$ : 315.1955, found 315.1956.

**(1R,5R,6S)-1,5-Dimethyl-5-hydroxy-9-oxabicyclo[4.2.1]nonan-2-on (27)**

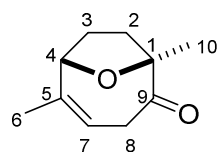

synthesized according to general procedure: 33.4 mg (201  $\mu\text{mol}$ , 93%) were isolated (eluent: petroleum ether/EtOAc 95:5) as a colorless oil.

**$R_f$  - value** (PE/EE, 95:5): 0.32.

**$^1\text{H}$ -NMR** (300 MHz,  $\text{CDCl}_3$ ):  $\delta = 5.14$ -5.07 (m, 1H, H-7), 4.76-4.67 (m, 1H, H-4), 4.00-3.87 (m, 1H, H-8a), 2.63 (dd, 1H,  $J = 14.0, 8.9$  Hz, H-8b), 2.21-1.96 (m, 2H, H-2a, H-3a), 1.86-1.70 (m, 2H, H-2b, H-3b), 1.62 (s, 3H, H-6), 1.39 (s, 3H, H-10).

**$^{13}\text{C}$ -NMR** (75 MHz,  $\text{CDCl}_3$ ):  $\delta = 214.6$  (C-9), 139.4 (C-5), 113.0 (C-7), 89.0 (C-1), 83.1 (C-4), 40.2 (C-8), 34.5 (C-2), 30.4 (C-3), 23.5 (C-10), 20.4 (C-6).

**IR** (ATR):  $\tilde{\nu} = 2972$  (m), 2932 (m), 1717 (s), 1446 (m), 1368 (w), 1285 (w), 1189 (m), 1118 (m), 1056 (s), 923 (m), 844 (w), 552 (m).

**MS** (EI-TOF)  $m/z$ :  $[\text{M}]^+$  calculated for  $\text{C}_{10}\text{H}_{14}\text{O}_2$ : 166.0994, found 166.10.

**(1R,7S)-1,6-Dimethyl-6-hydroxy-2-aza-10-oxabicyclo[5.2.1]dec-5-en-3-on (29)**

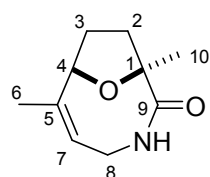

synthesized according to general procedure: 13.1 mg (72.3  $\mu\text{mol}$ , 51%) were isolated (eluent: DCM/MeOH 95:5) as a colorless oil.

**$R_f$  - value** (DCM/MeOH, 95:5): 0.38.

**$^1\text{H}$ -NMR** (300 MHz,  $\text{CDCl}_3$ ):  $\delta = 5.99$  (s, br, 1H, NH), 5.53-5.41 (m, 1H, H-7), 5.18-5.03 (m, 1H, H-8a), 4.7-4.65 (m, 1H, H-4), 3.11 (ddd, 1H,  $J = 15.0, 8.8, 7.9$  Hz, H-8b), 2.65-2.54 (m, 1H, H-4a), 2.34-2.19 (m, 1H, H-3a), 1.89-1.71 (m, 2H, H-3b, H-4b), 1.61 (s, 3H, H-6), 1.59 (s, 3H, H-10).

**$^{13}\text{C}$ -NMR** (125 MHz,  $\text{CDCl}_3$ ):  $\delta = 179.2$  (C-9), 142.8 (C-5), 120.7 (C-7), 83.9 (C-4), 51.0 (C-1), 40.1 (C-8), 38.2 (C-4), 31.7 (C-3), 24.7 (C-10), 19.9 (C-6).

**IR** (ATR):  $\tilde{\nu} = 3219$  (br, m), 2974 (m), 1707 (s), 1640 (s), 1462 (m), 1351 (m), 1265 (w), 1128 (w), 766 (w).

**HRMS** (ESI-TOF)  $m/z$ :  $[\text{M}+\text{H}]^+$  calculated for  $\text{C}_{10}\text{H}_{16}\text{NO}_2$ : 182.1176, found 182.1174.

**(2*R*, 6*S*)-2-Benzoyloxymethyl-6-(prop-1-en-2-yl)-tetrahydropyran (31)**

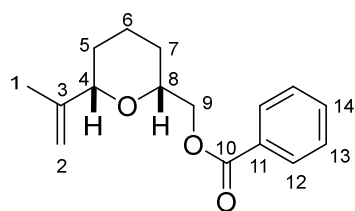

synthesized according to general procedure: 25.1 mg (96.4  $\mu$ mol, 98%) were isolated (eluent: petroleum ether/EtOAc 95:5) as a colorless oil.

**R<sub>f</sub> - value** (PE/EE, 95:5): 0.53.

**<sup>1</sup>H-NMR** (400 MHz, CDCl<sub>3</sub>):  $\delta$  = 8.06 (dd, 2H, J = 8.3, 1.4 Hz, H-13), 7.59-7.52 (m, 1H, H-14), 7.43 (dd, 2H, J = 8.3, 7.0 Hz, H-12), 5.02-4.94 (m, 2H, H-2), 4.45-4.37 (m, 1H, H-9a), 4.35-4.24 (m, 2H, H-9b, H-4), 3.97 (tdd, 1H, J = 7.5, 4.2, 2.9 Hz, H-8), 1.88-1.64 (m, 8H, H-5, H-6, H-1, H-7a), 1.55-1.43 (m, 1H, H-7b).

**<sup>13</sup>C-NMR** (100 MHz, CDCl<sub>3</sub>):  $\delta$  = 166.7 (C-10), 144.5 (C-11), 133.1 (C-14), 130.3 (C-3), 129.8 (C-13), 128.5 (C-12), 112.5 (C-2), 74.7 (C-4), 69.5 (C-8), 66.7 (C-9), 27.2 (C-7), 26.8 (C-5), 20.1 (C-1), 19.0 (C-6).

**IR** (ATR):  $\tilde{\nu}$  = 2942 (m), 2870 (w), 1717 (s), 1450 (m), 1269 (s), 1111 (m), 1094 (m), 900 (m), 710 (s).

**HRMS** (ESI-TOF)  $m/z$ : [M+H]<sup>+</sup> calculated for C<sub>16</sub>H<sub>20</sub>NaO<sub>3</sub>: 283.1305, found 283.1307.

**(2*R*, 6*R*)-2-(1-(Acetoxy)undecyl)-6-(prop-1-en-2-yl)-tetrahydropyran (33)**

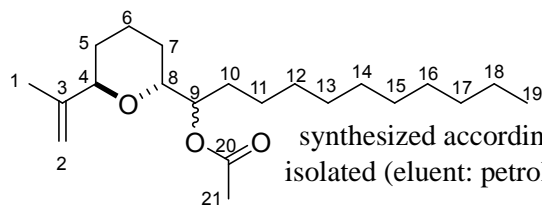

synthesized according to general procedure: 17.9 mg (52.9  $\mu$ mol, 86%) were isolated (eluent: petroleum ether/EtOAc 95:5) as a colorless oil.

**R<sub>f</sub> - value** (PE/EE, 95:5): 0.42.

**<sup>1</sup>H-NMR** (300 MHz, CDCl<sub>3</sub>):  $\delta$  = 5.06-4.97 (m, 2H, H-4, H-2a), 4.92 (s, 1H, H-2b), 4.32-4.23 (m, 1H, H-9), 3.53 (ddd, 1H, J = 8.8, 5.6, 3.2 Hz, H-8), 2.09 (s, 3H, H-21), 1.86-1.58 (m, 8H, H-5, H-1, H-7, H-6a), 1.53-1.37 (m, 2H, H-6b, H-10a), 1.36-1.17 (m, 17H, H-10b, H-11, H-12, H-13, H-14, H-15, H-16, H-17, H-18), 0.88 (t, 3H, J = 6.7 Hz, H-19).

**<sup>13</sup>C-NMR** (75 MHz, CDCl<sub>3</sub>):  $\delta$  = 171.1 (C-20), 144.5 (C-3), 112.6 (C-2), 74.9 (C-4), 74.8 (C-9), 72.3 (C-8), 32.1 (CH<sub>2</sub>), 30.7 (CH<sub>2</sub>), 29.7 (CH<sub>2</sub>), 29.7 (CH<sub>2</sub>), 29.6 (CH<sub>2</sub>), 29.6 (CH<sub>2</sub>), 29.5 (CH<sub>2</sub>), 27.2 (CH<sub>2</sub>), 26.5 (C-5), 25.5 (CH<sub>2</sub>), 22.8 (C-7), 21.3 (C-21), 20.3 (C-1), 19.2 (C-6), 14.3 (C-19).

**IR** (ATR):  $\tilde{\nu}$  = 2924 (s), 2854 (m), 1737 (s), 1460 (w), 1372 (m), 1239 (s), 1040 (m), 898 (m).

**HRMS** (ESI-TOF)  $m/z$ : [M+H]<sup>+</sup> calculated for C<sub>21</sub>H<sub>38</sub>NaO<sub>3</sub>: 361.2713, found 361.2708.

### 3. $^1\text{H}$ and $^{13}\text{C}$ NMR Spectra

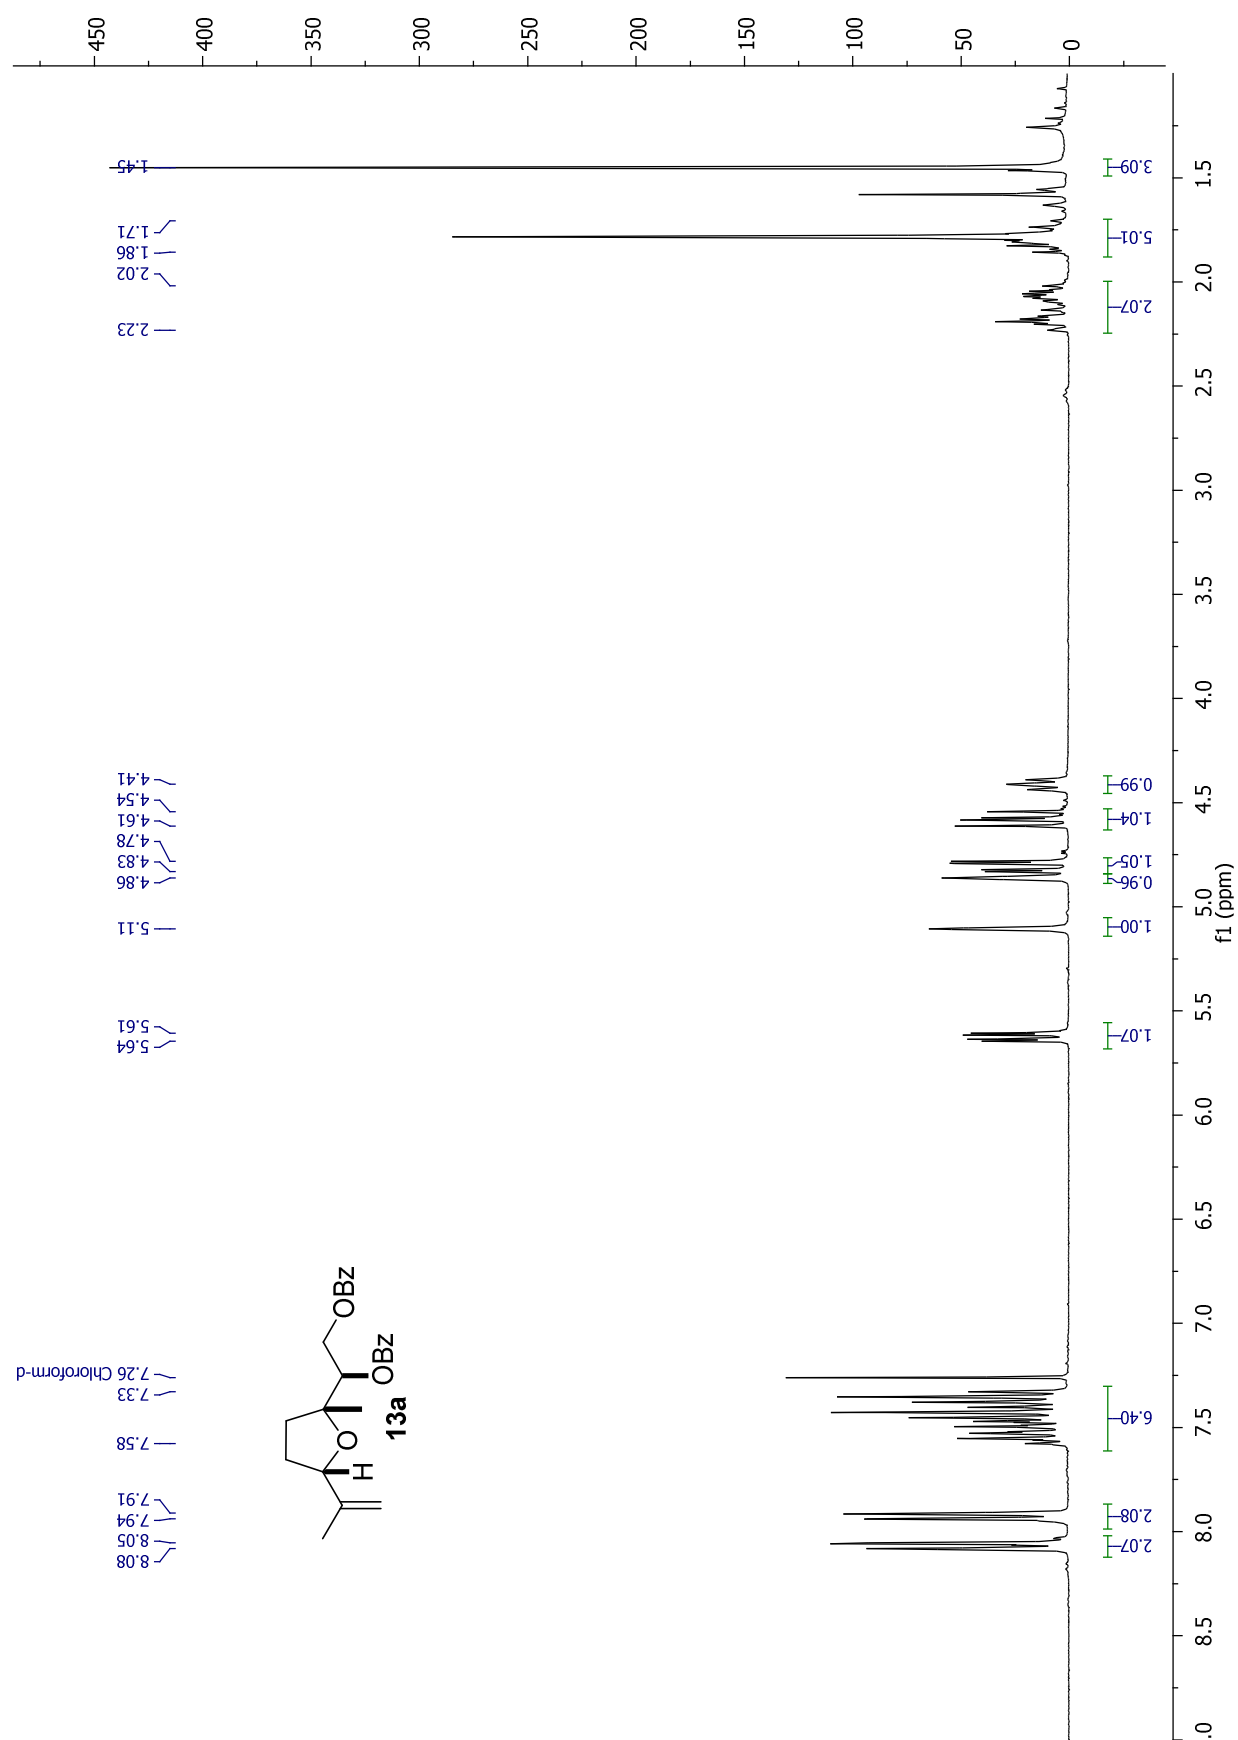



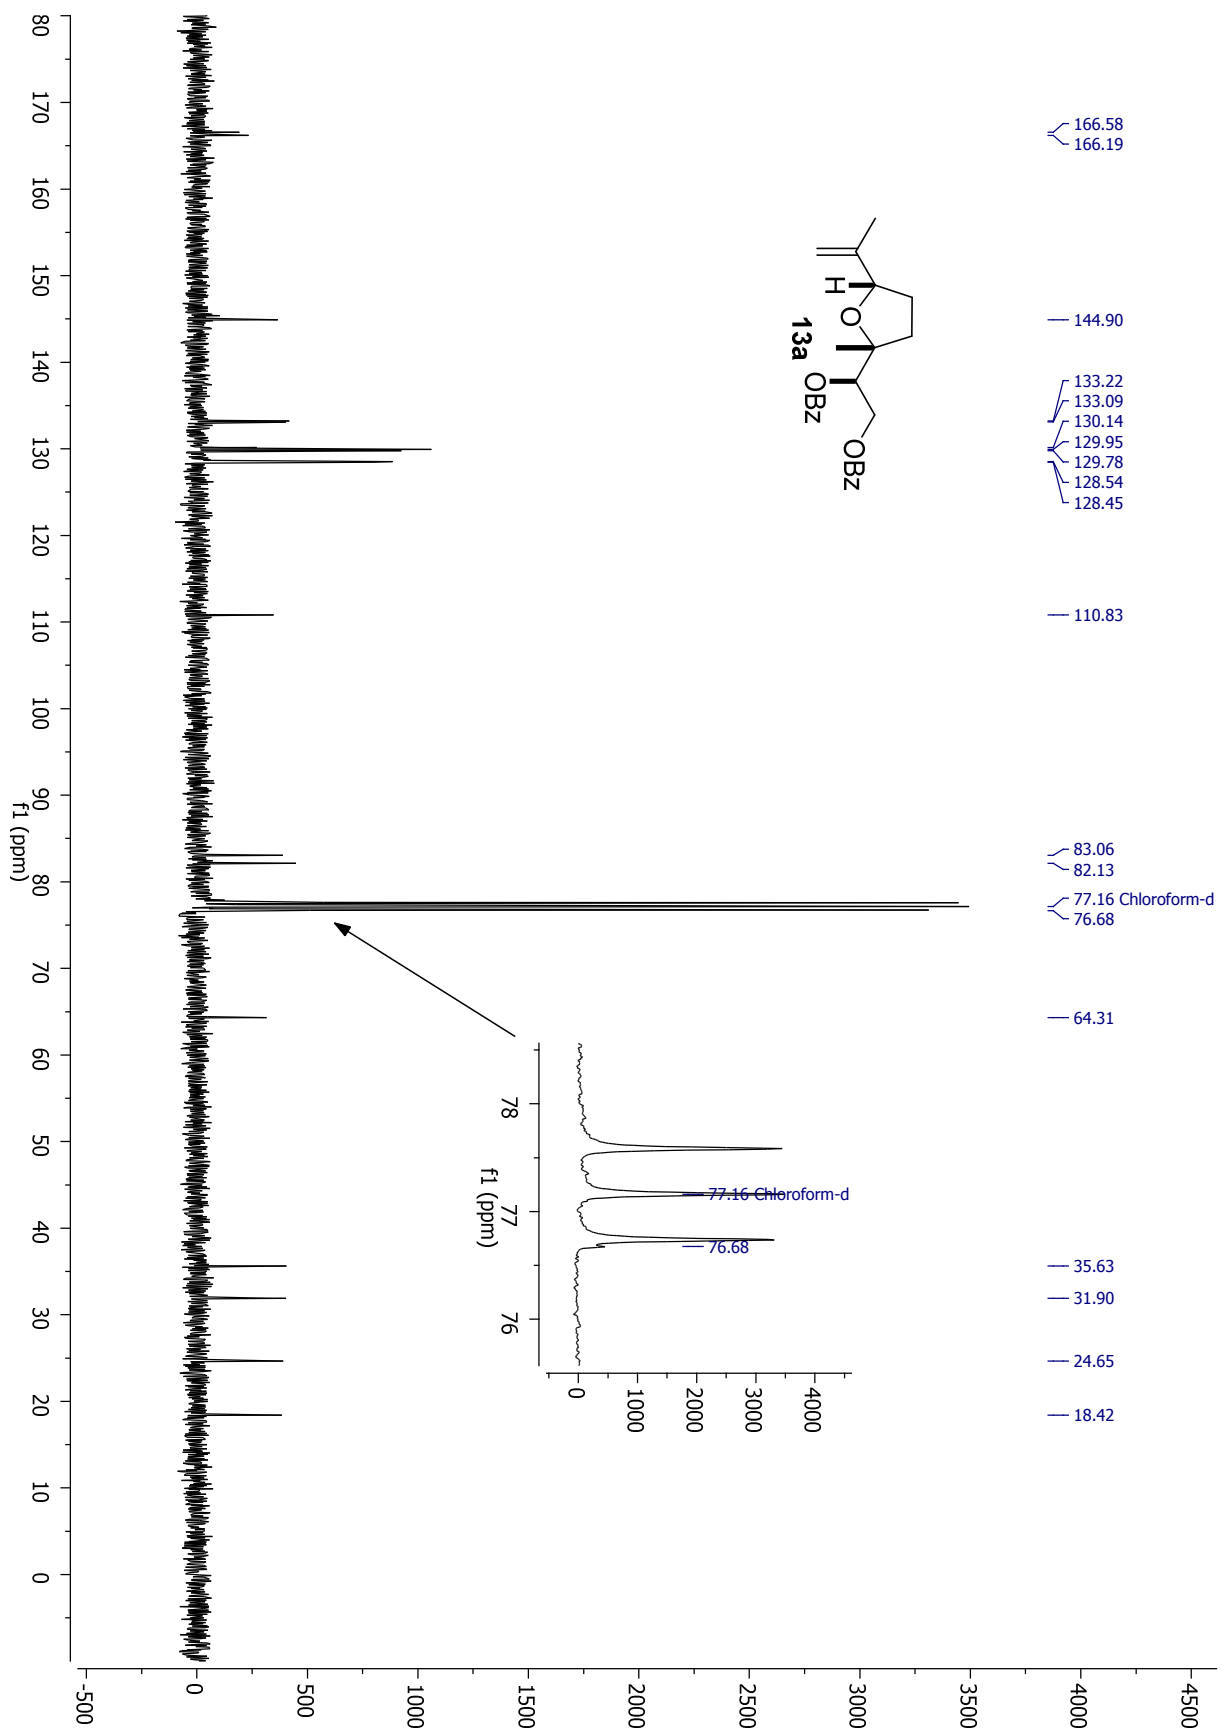

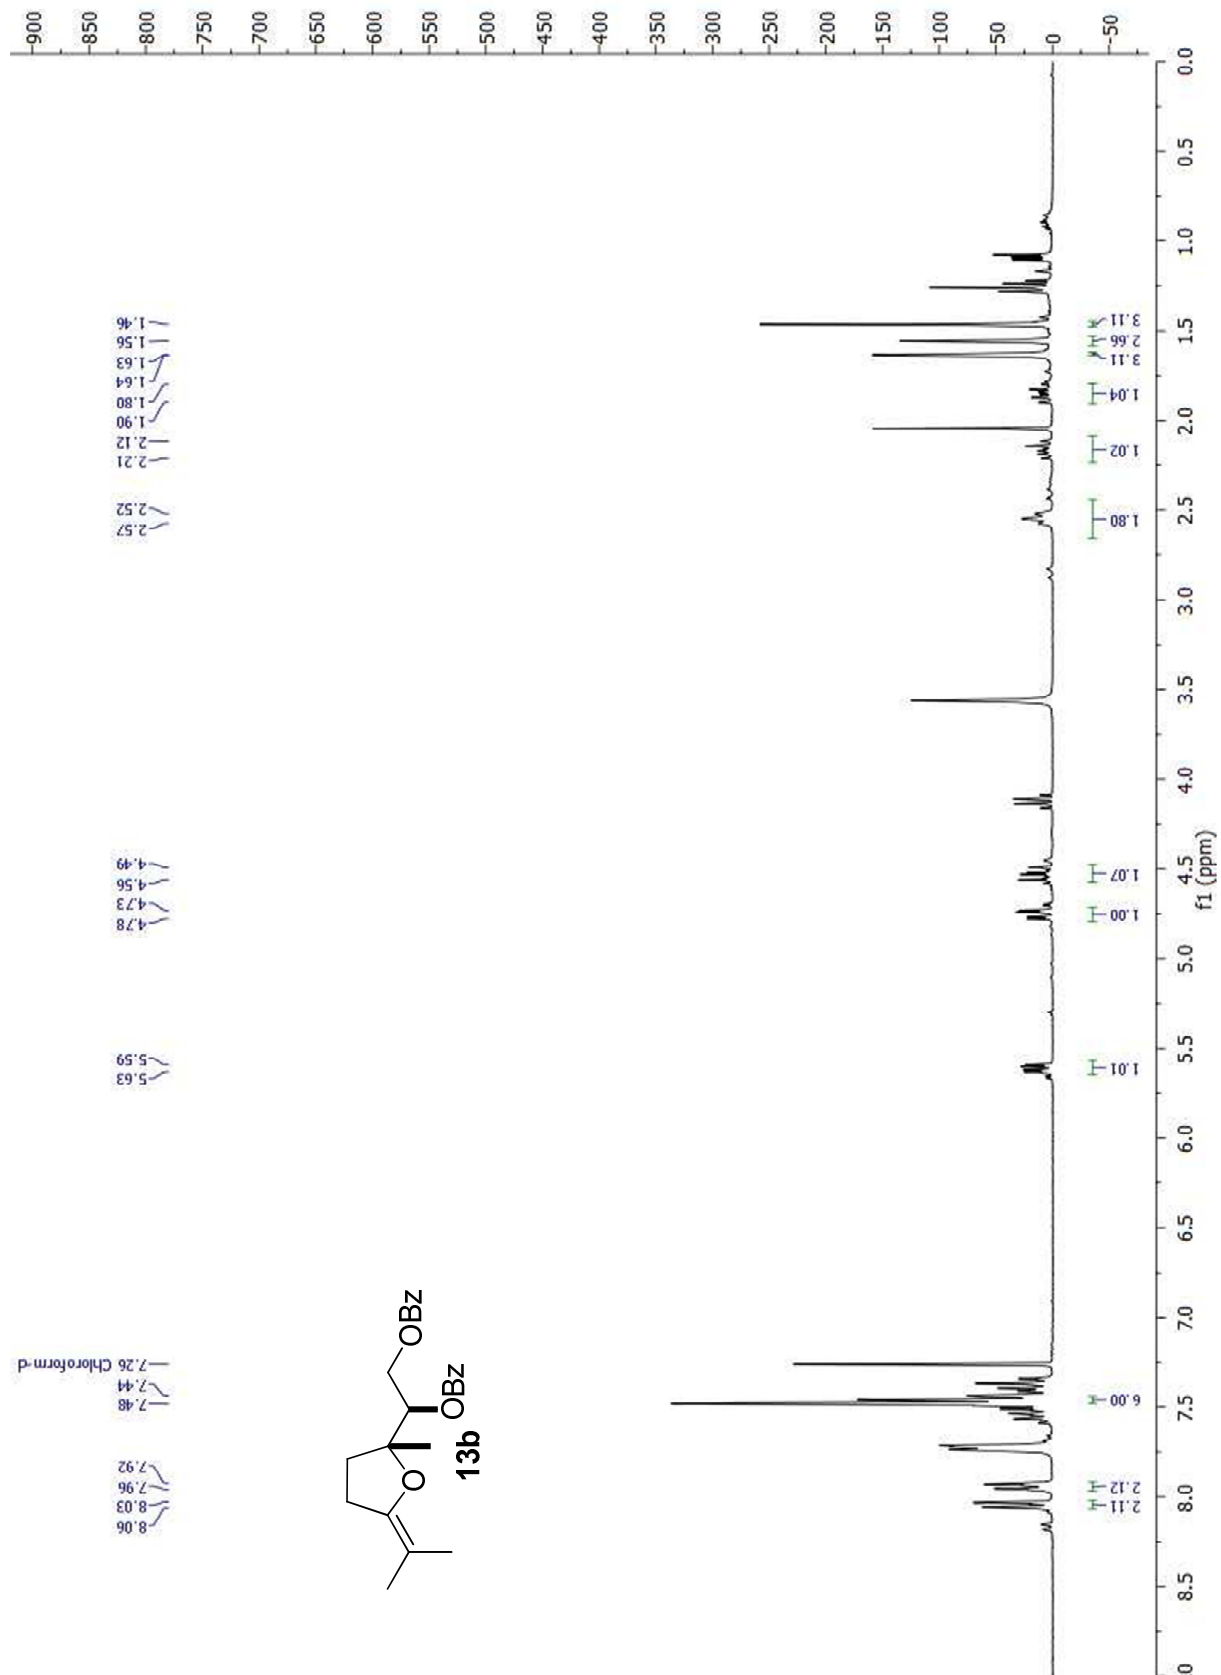

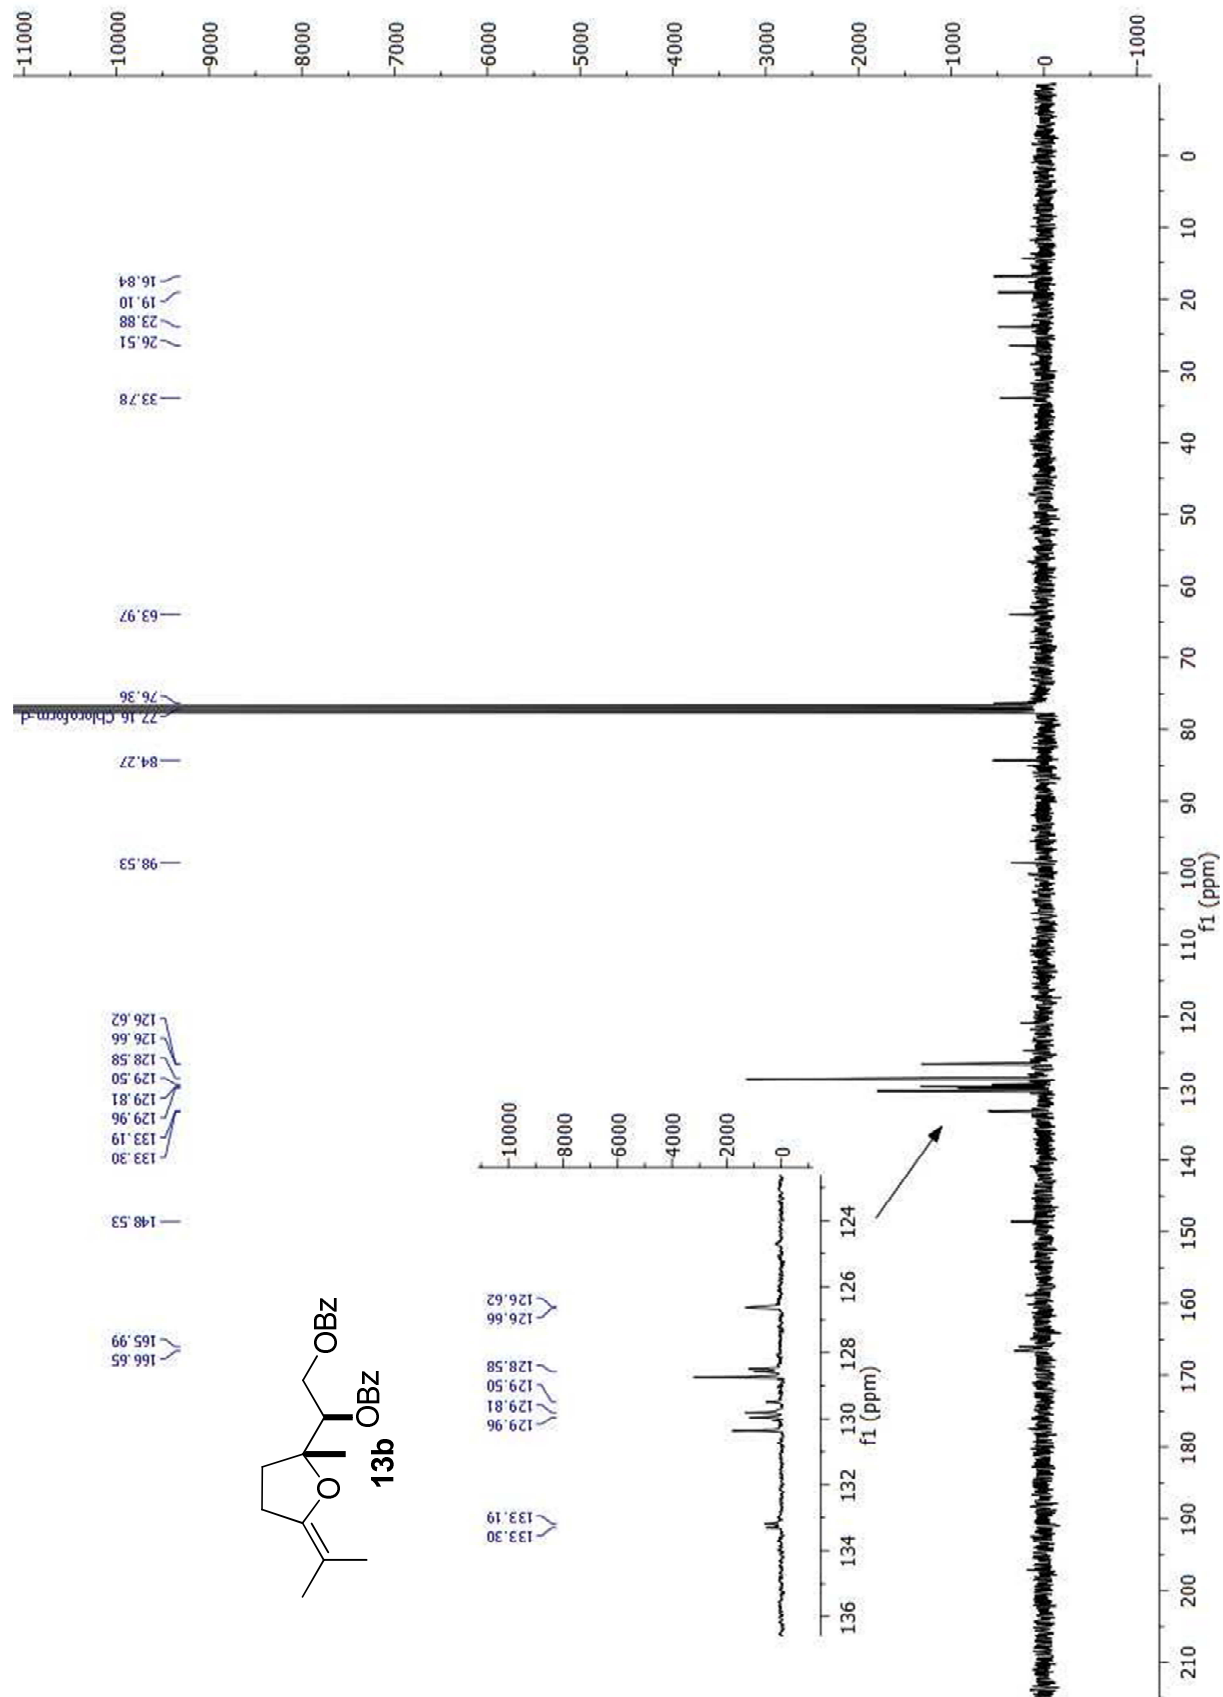

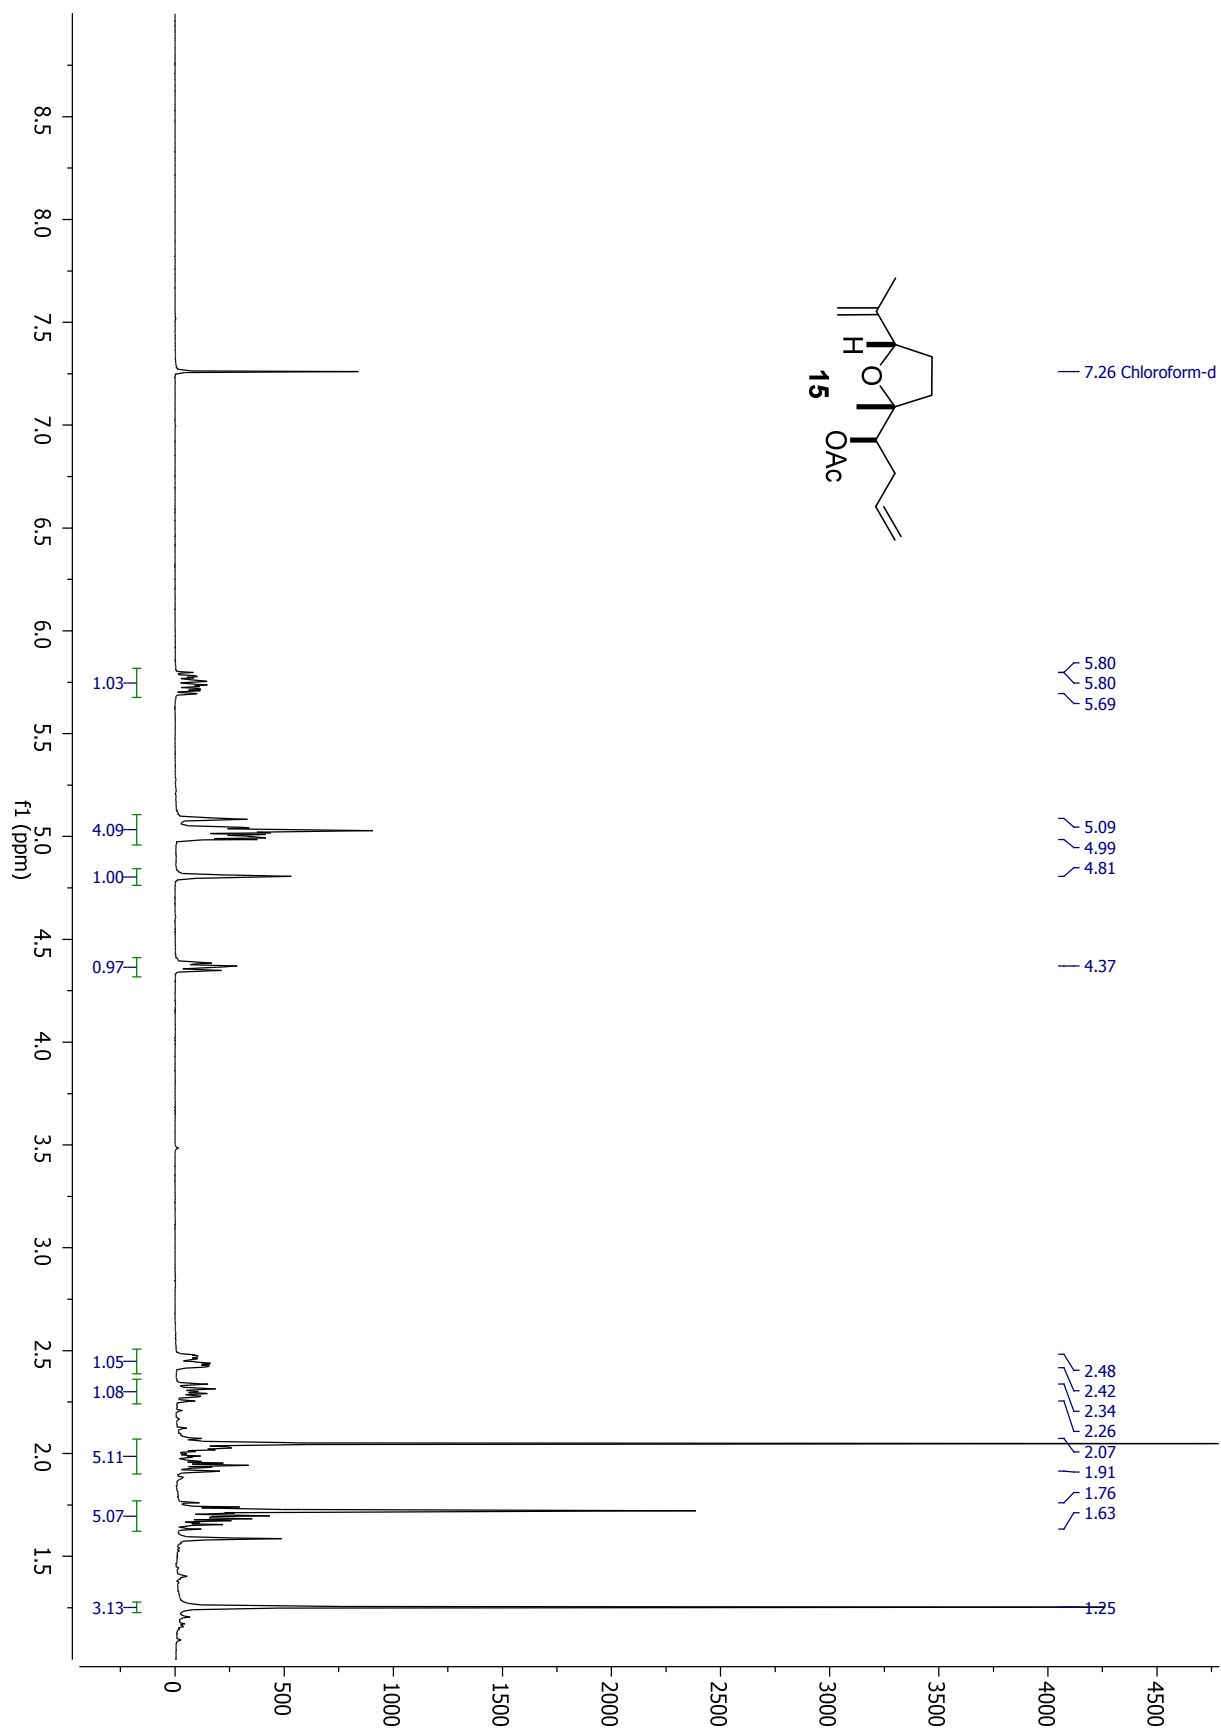

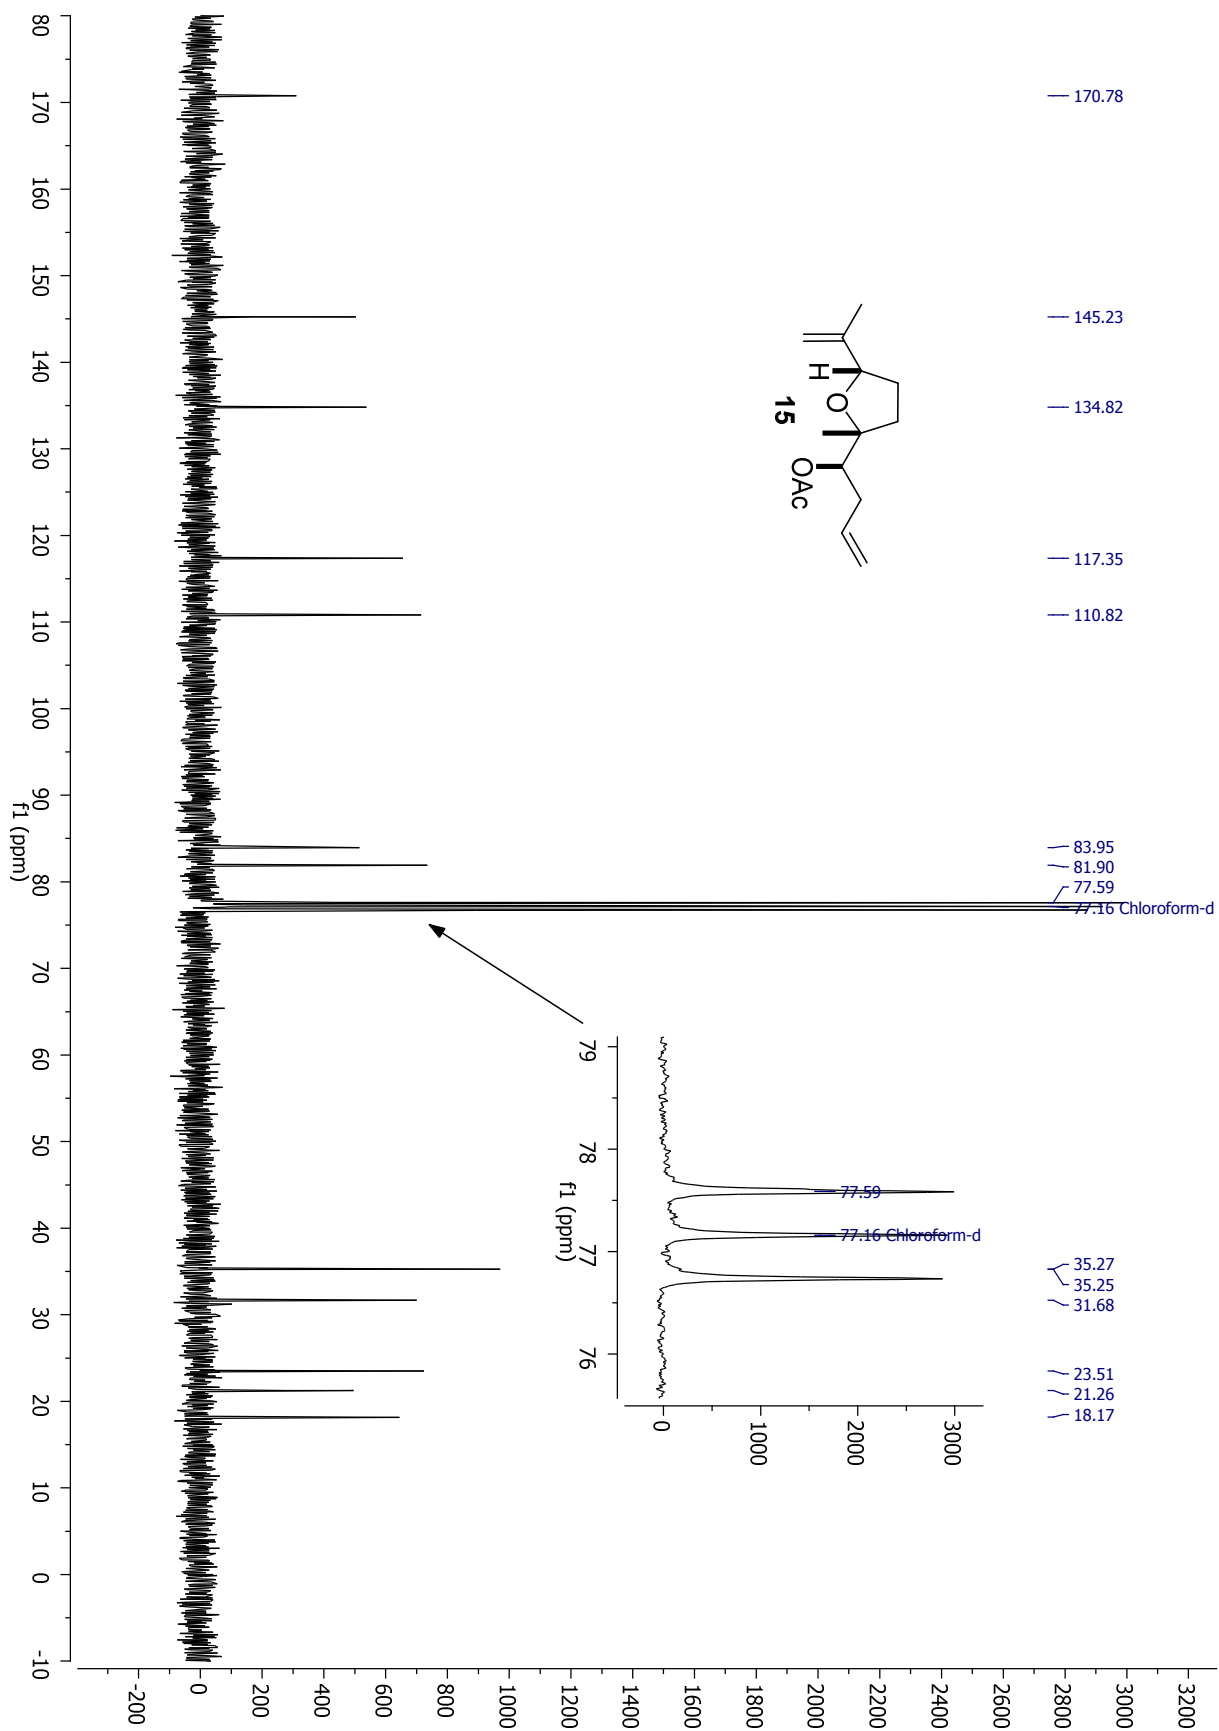

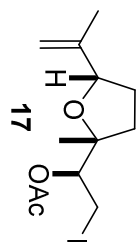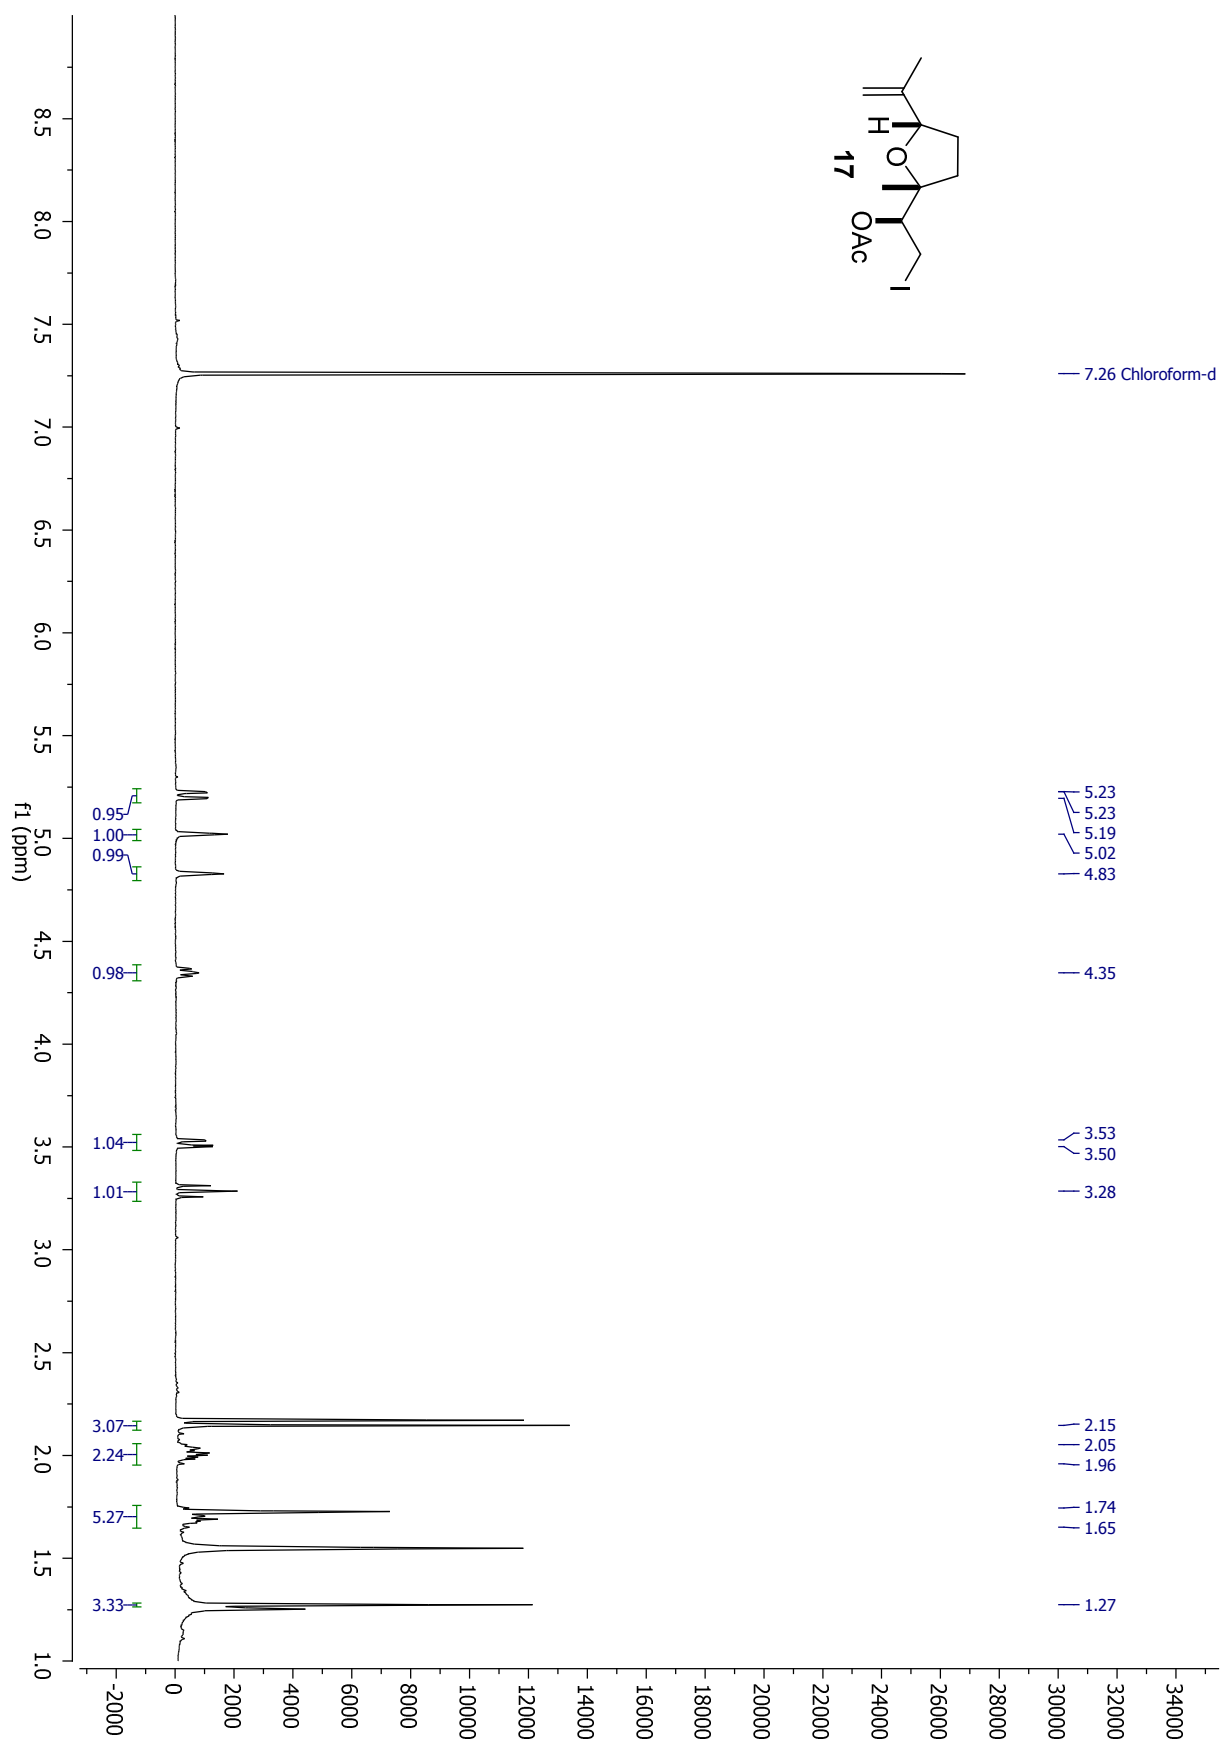

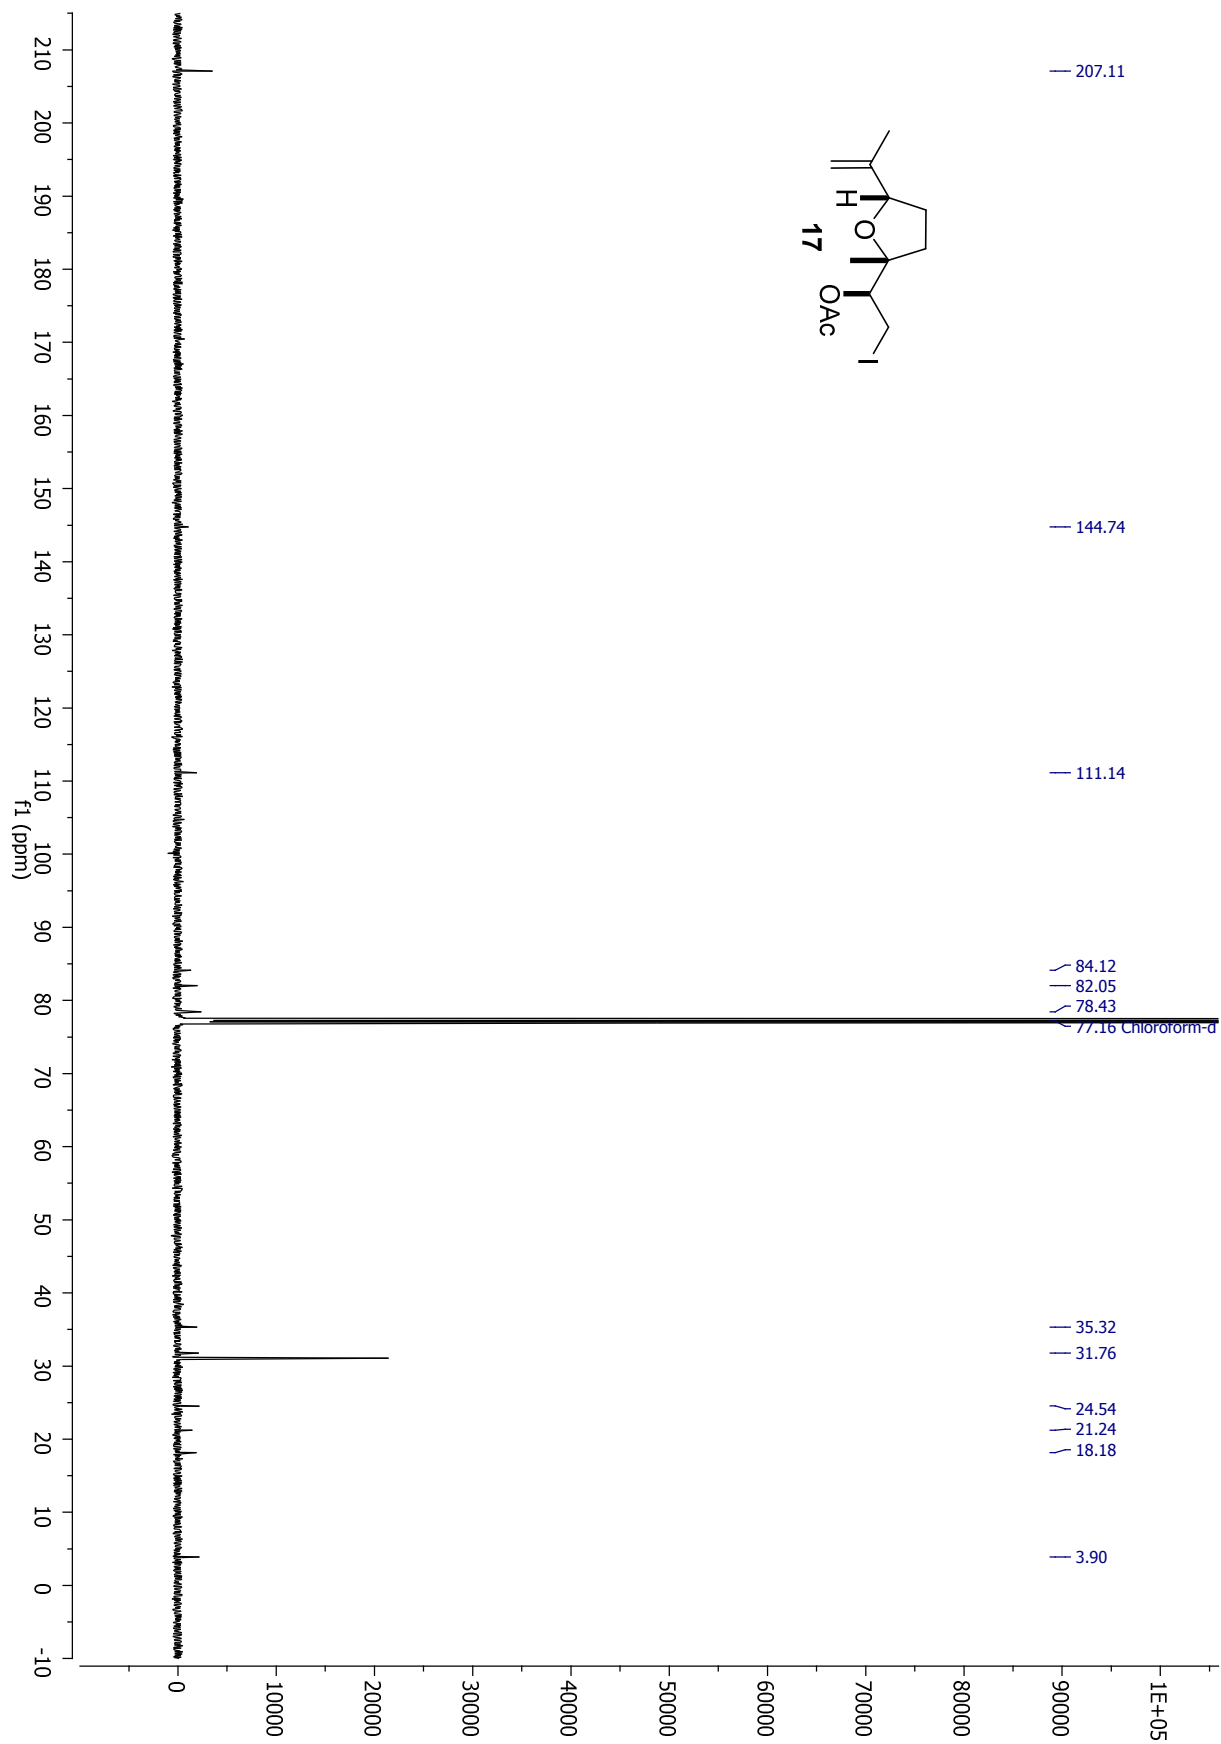

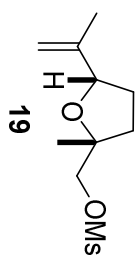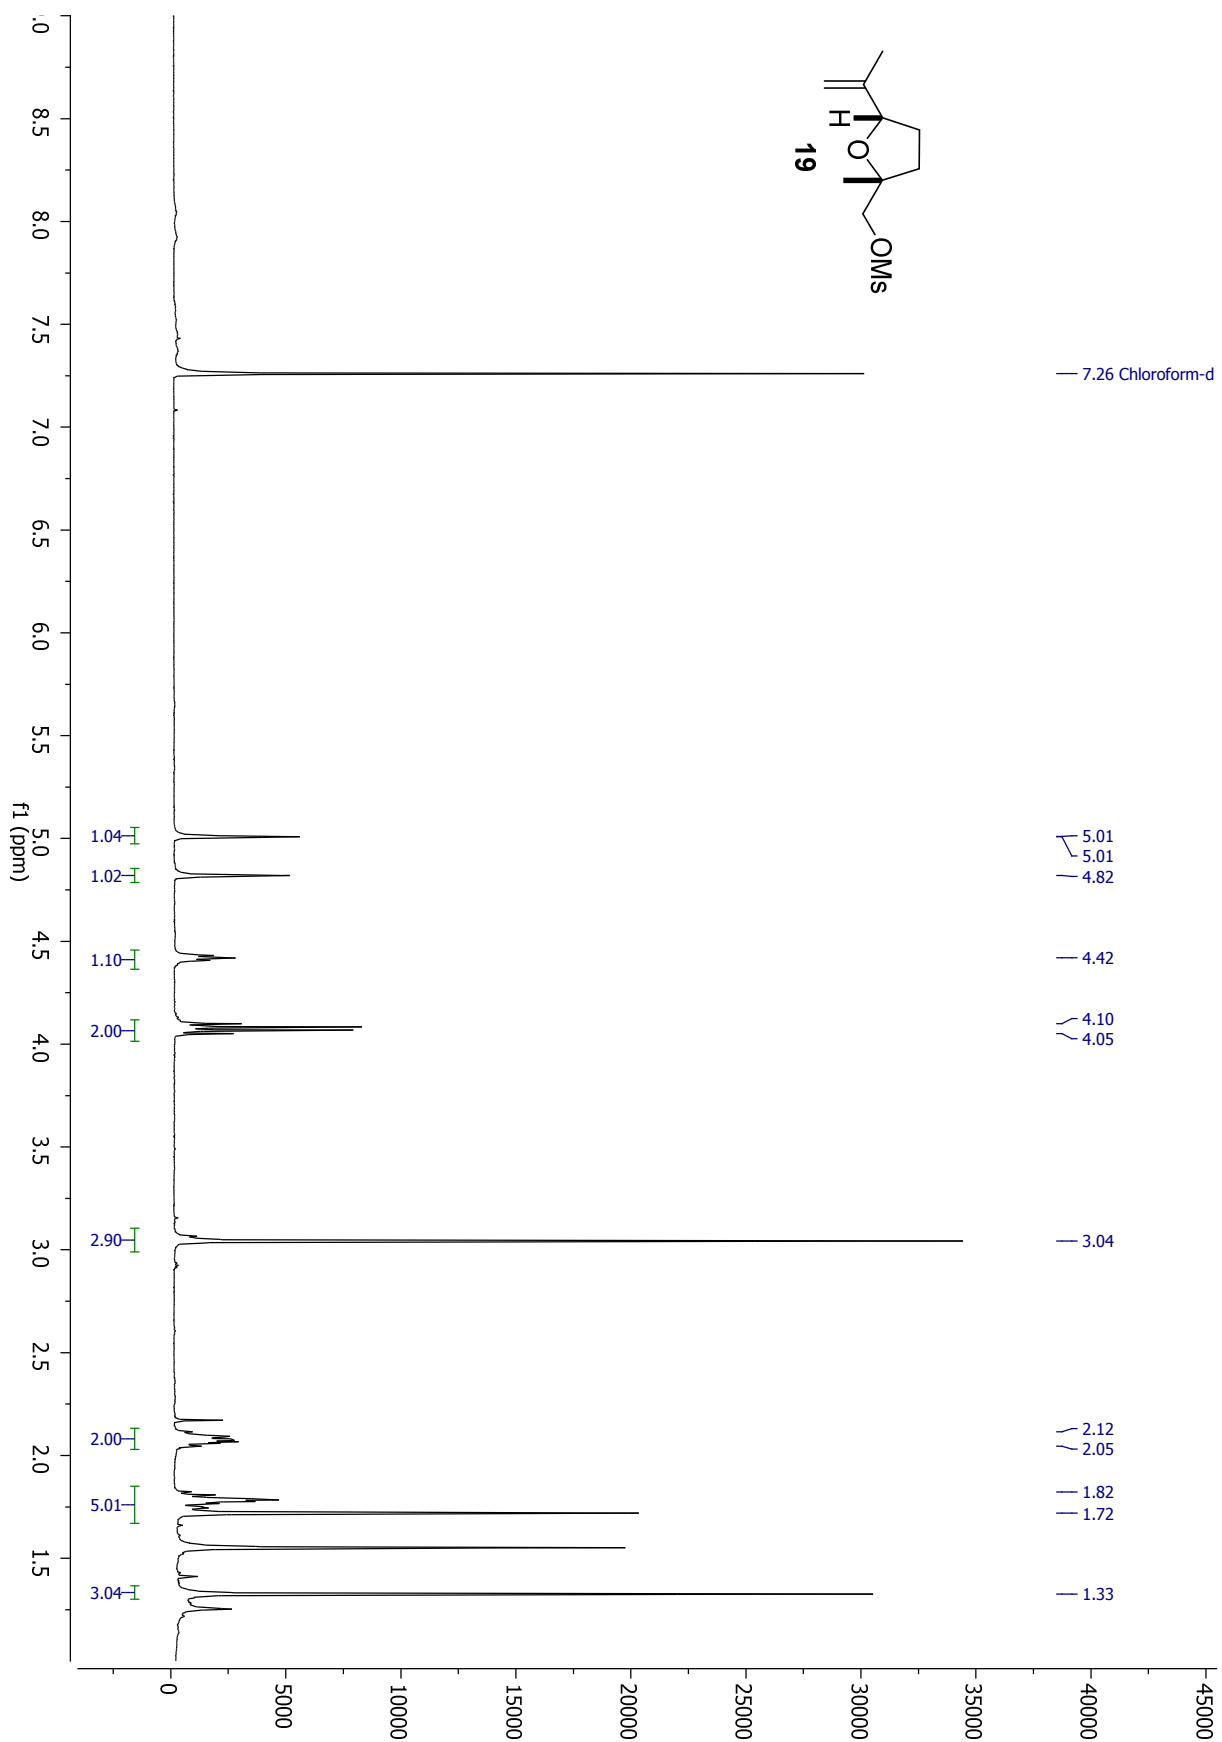



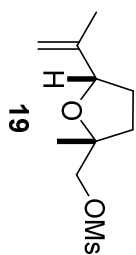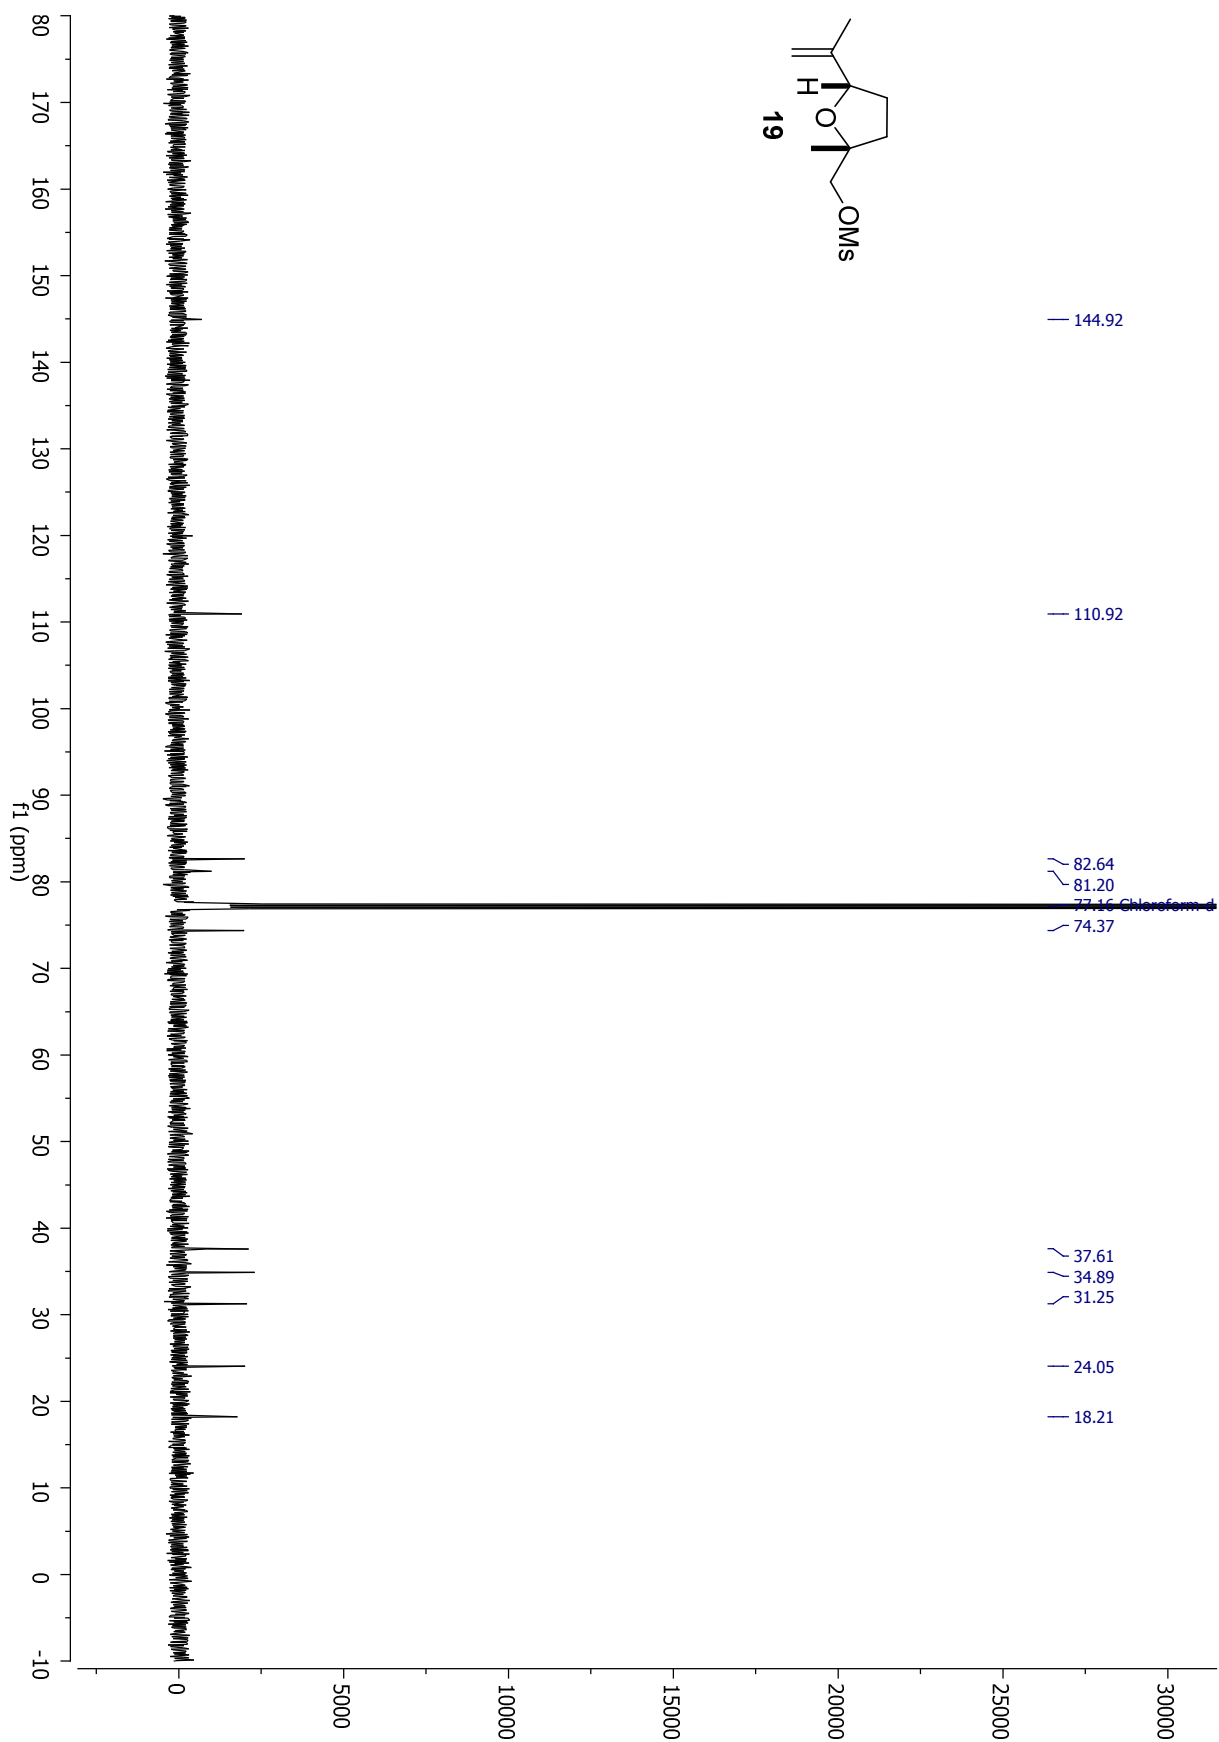

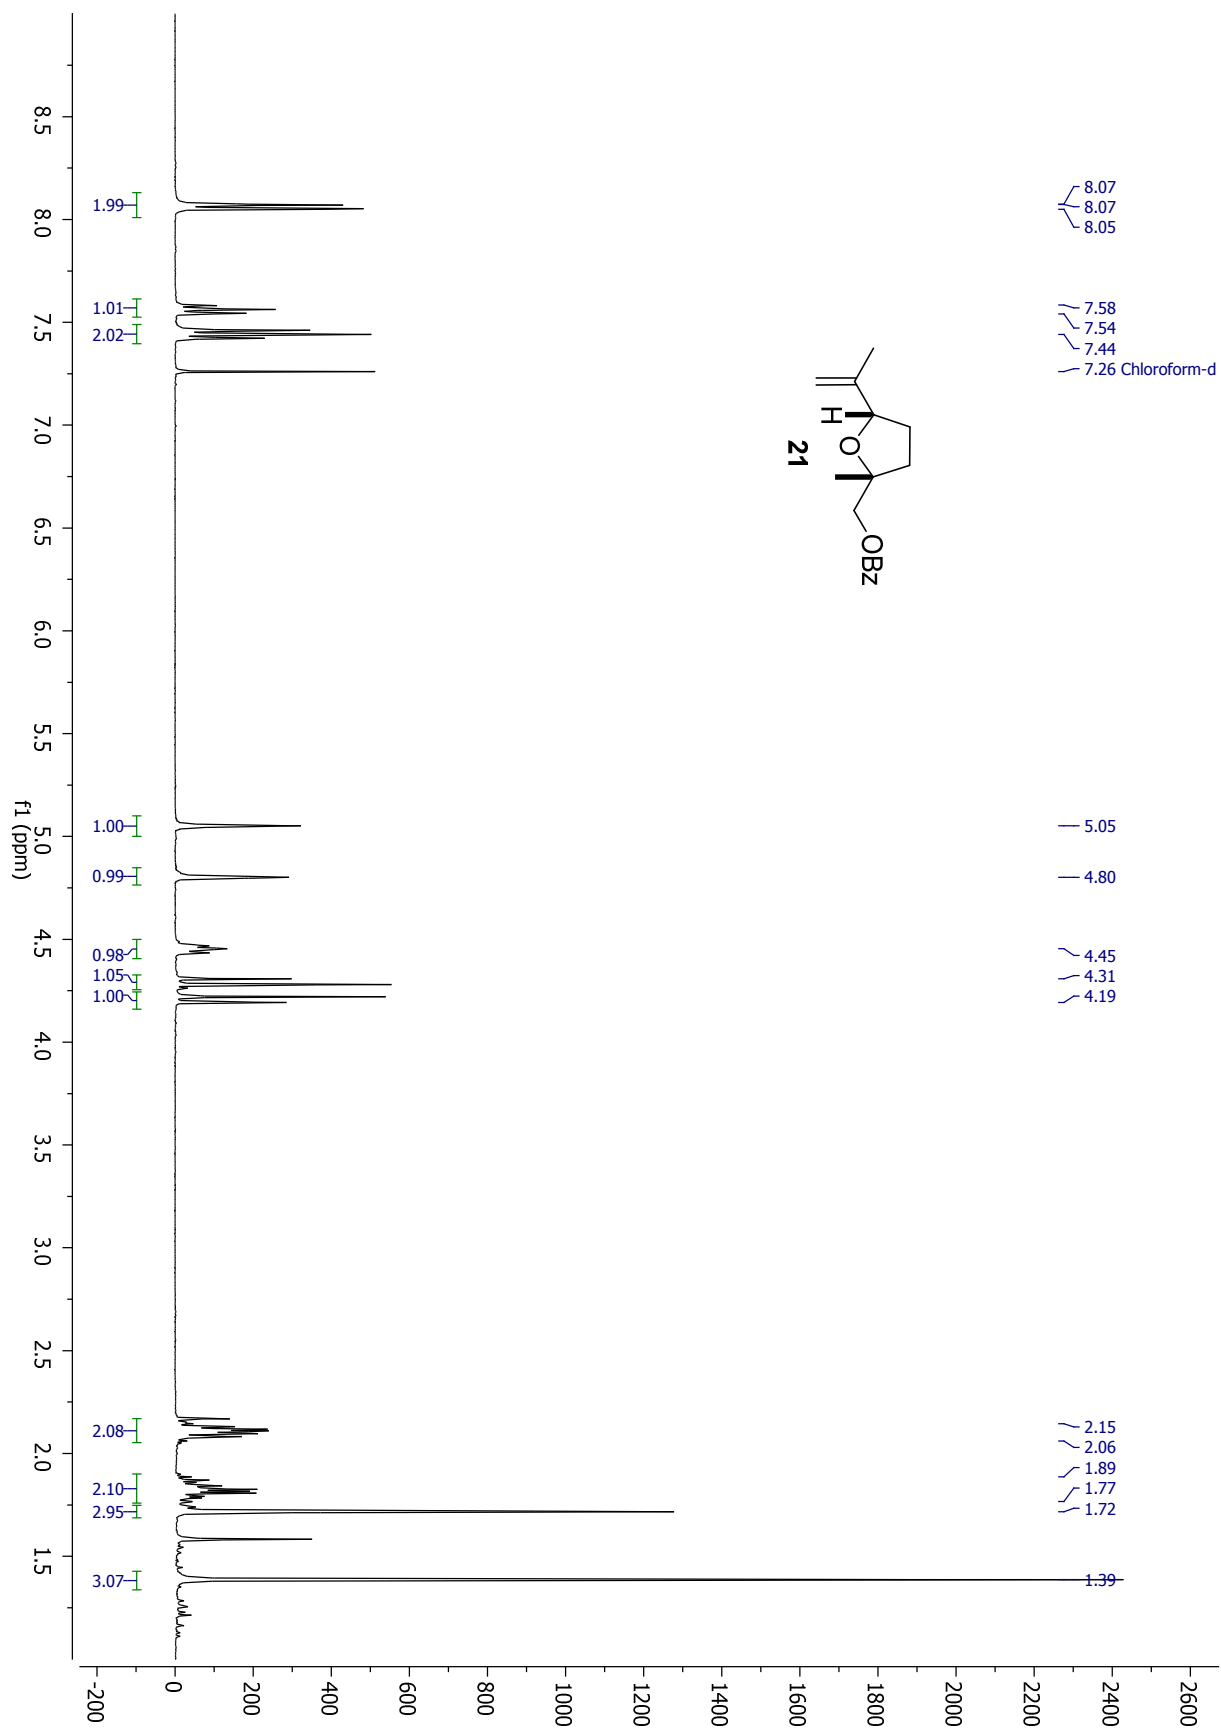

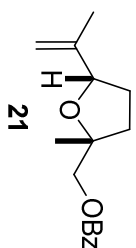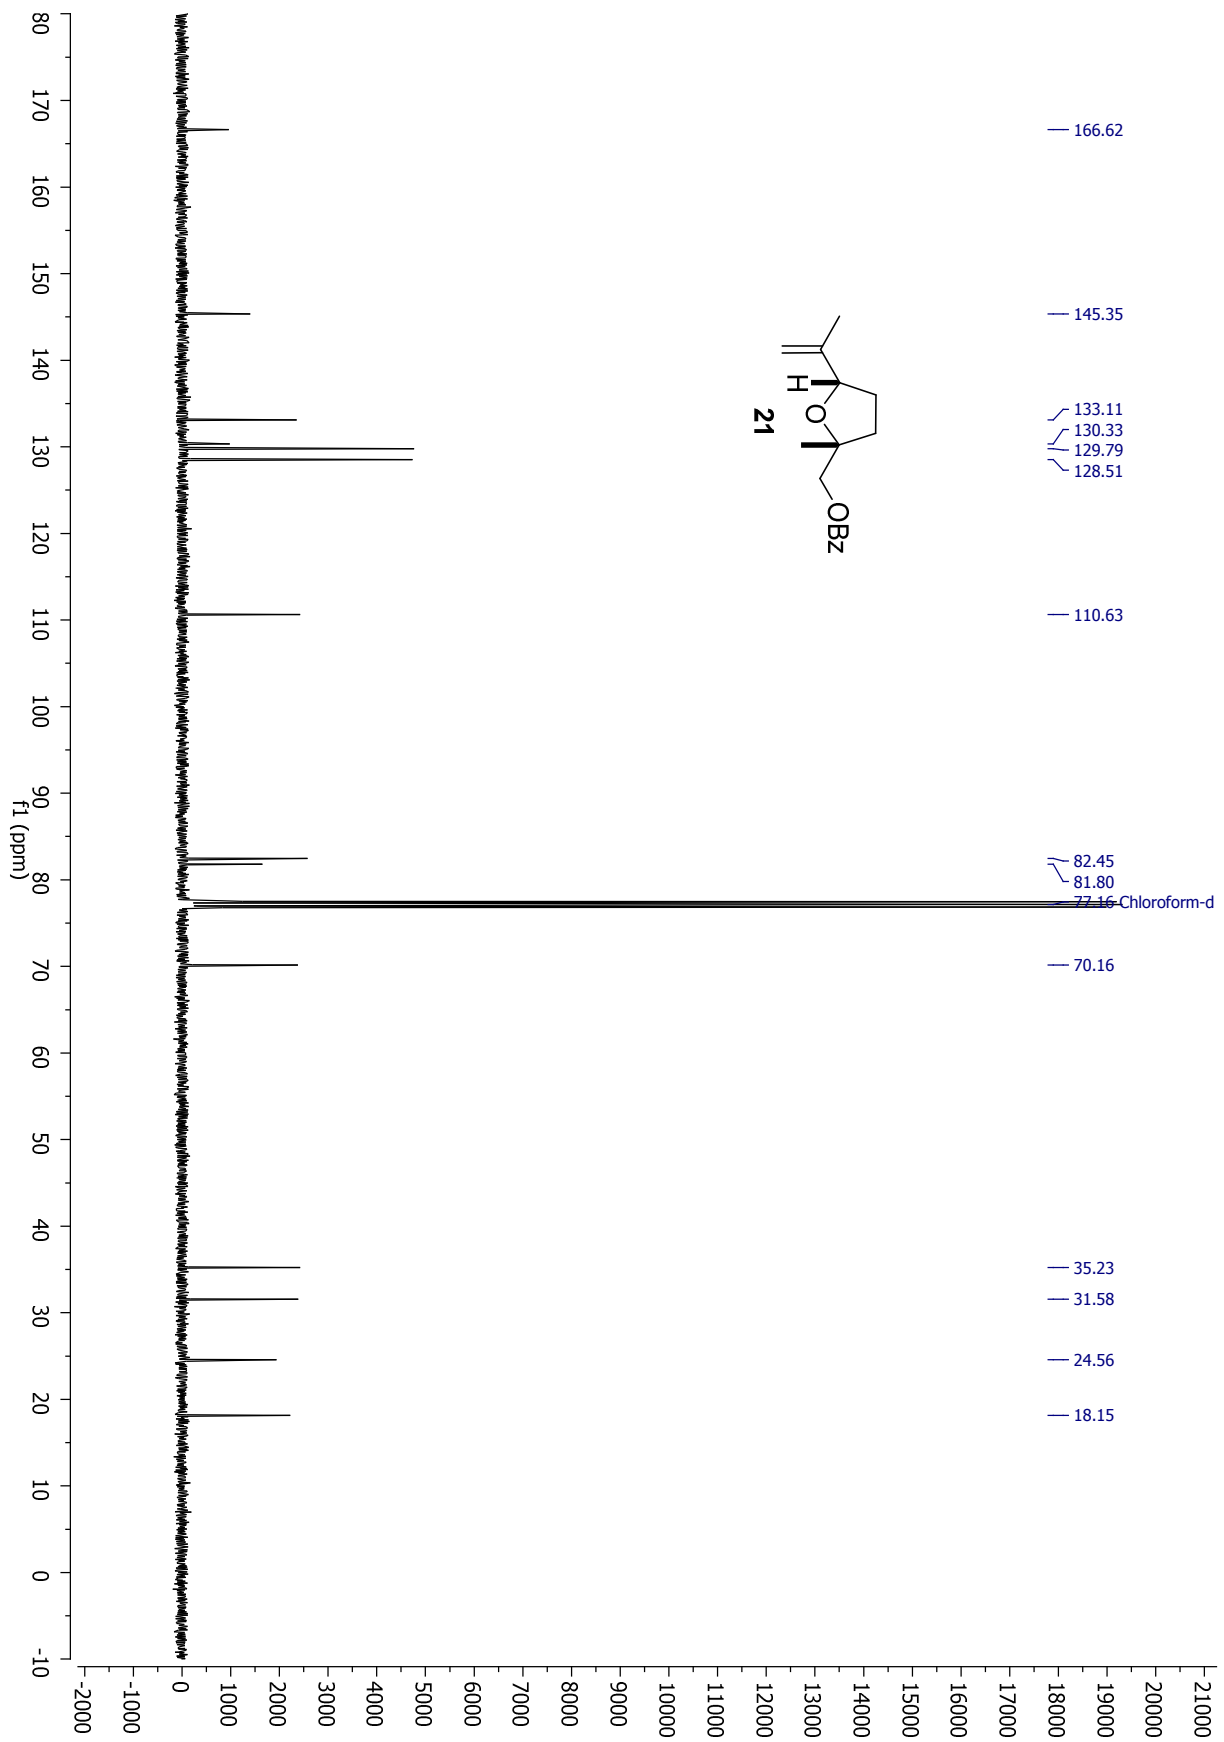

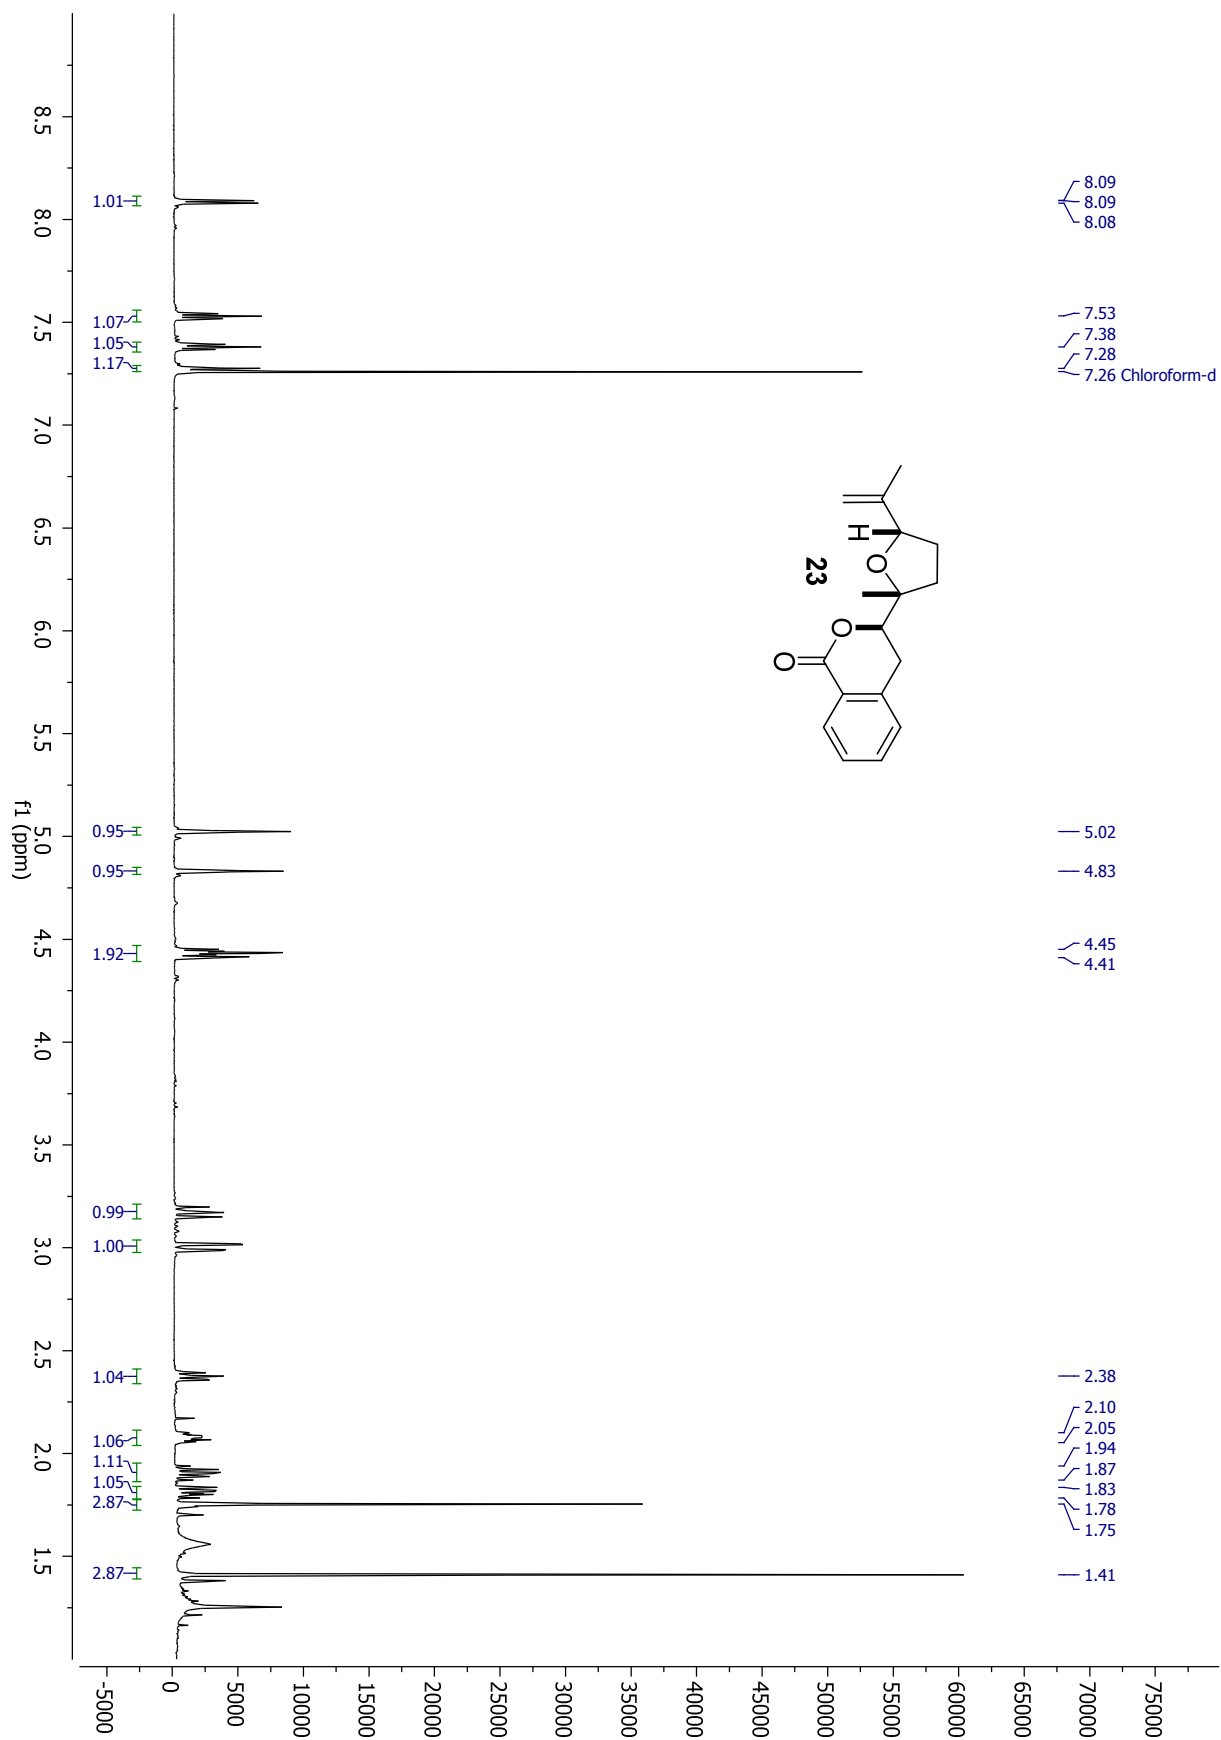

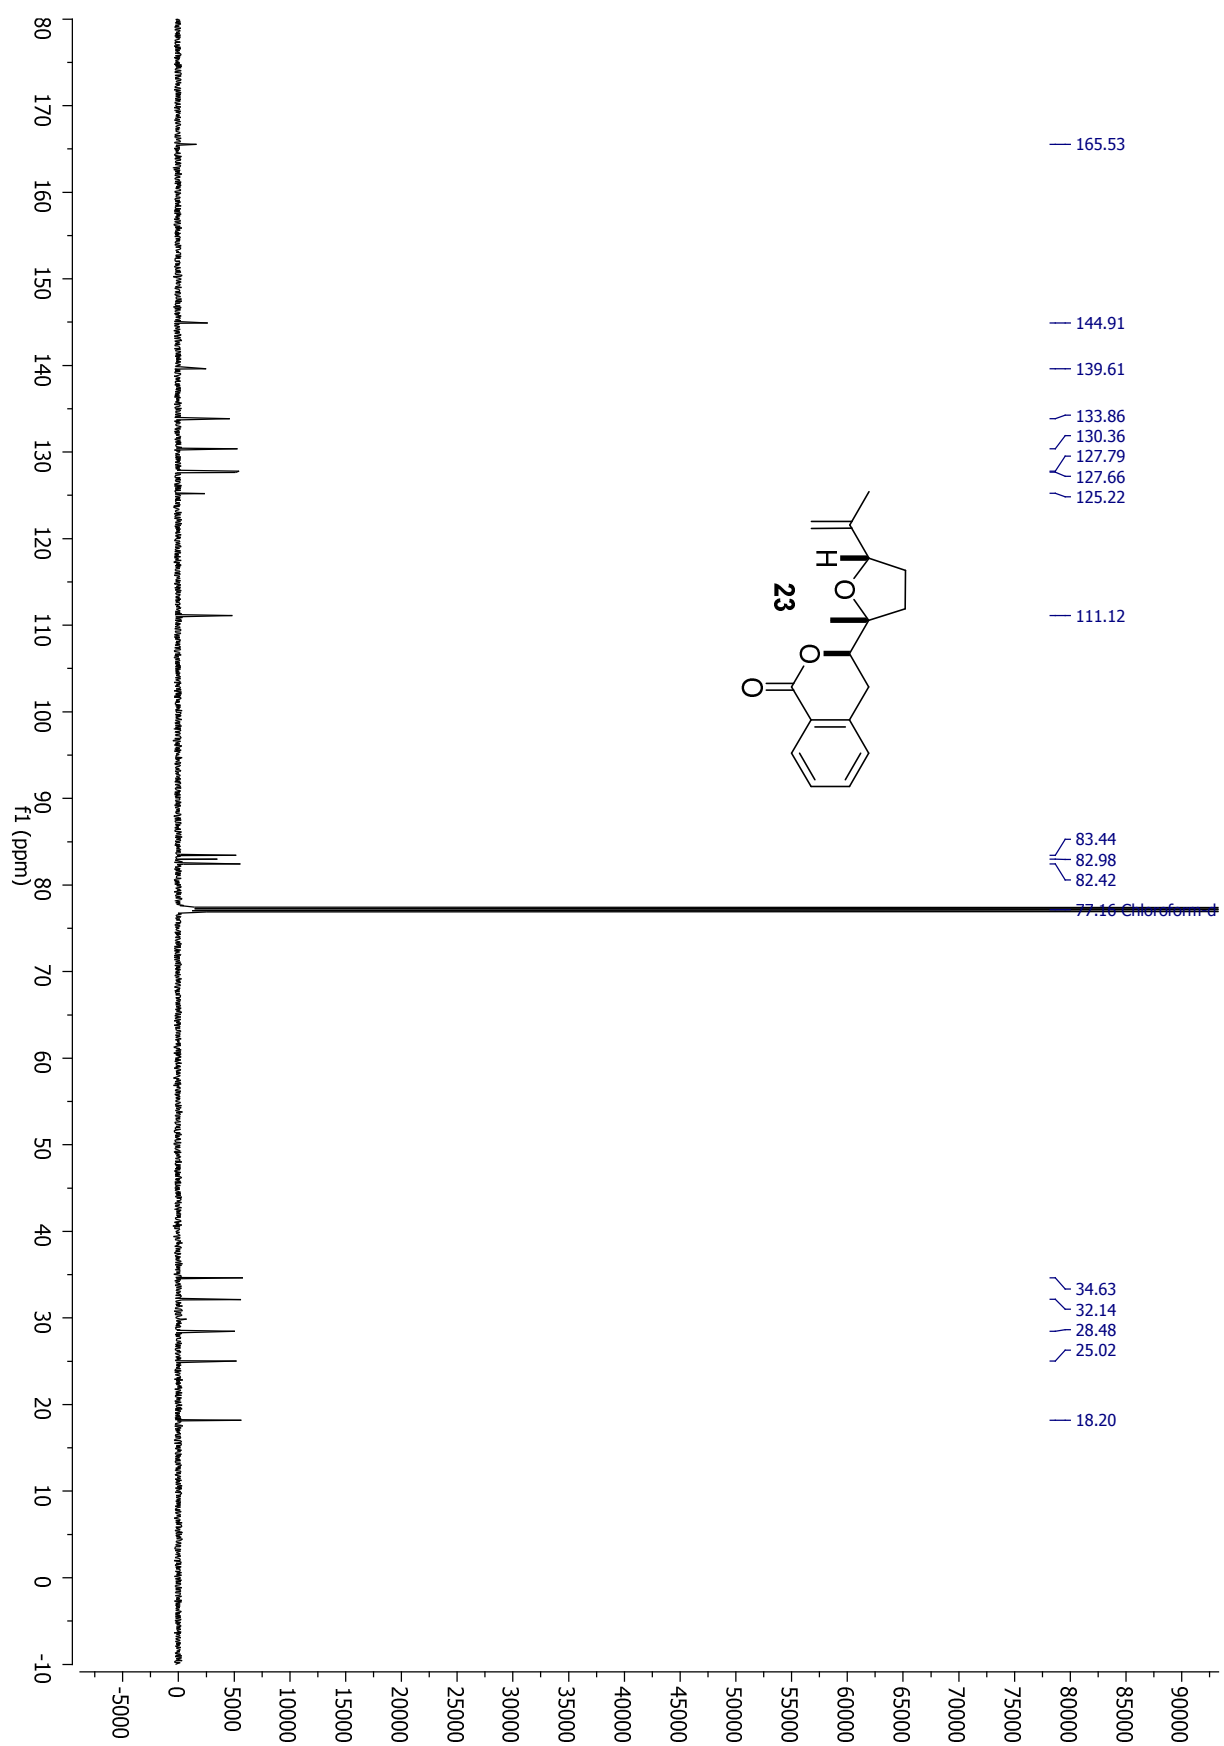

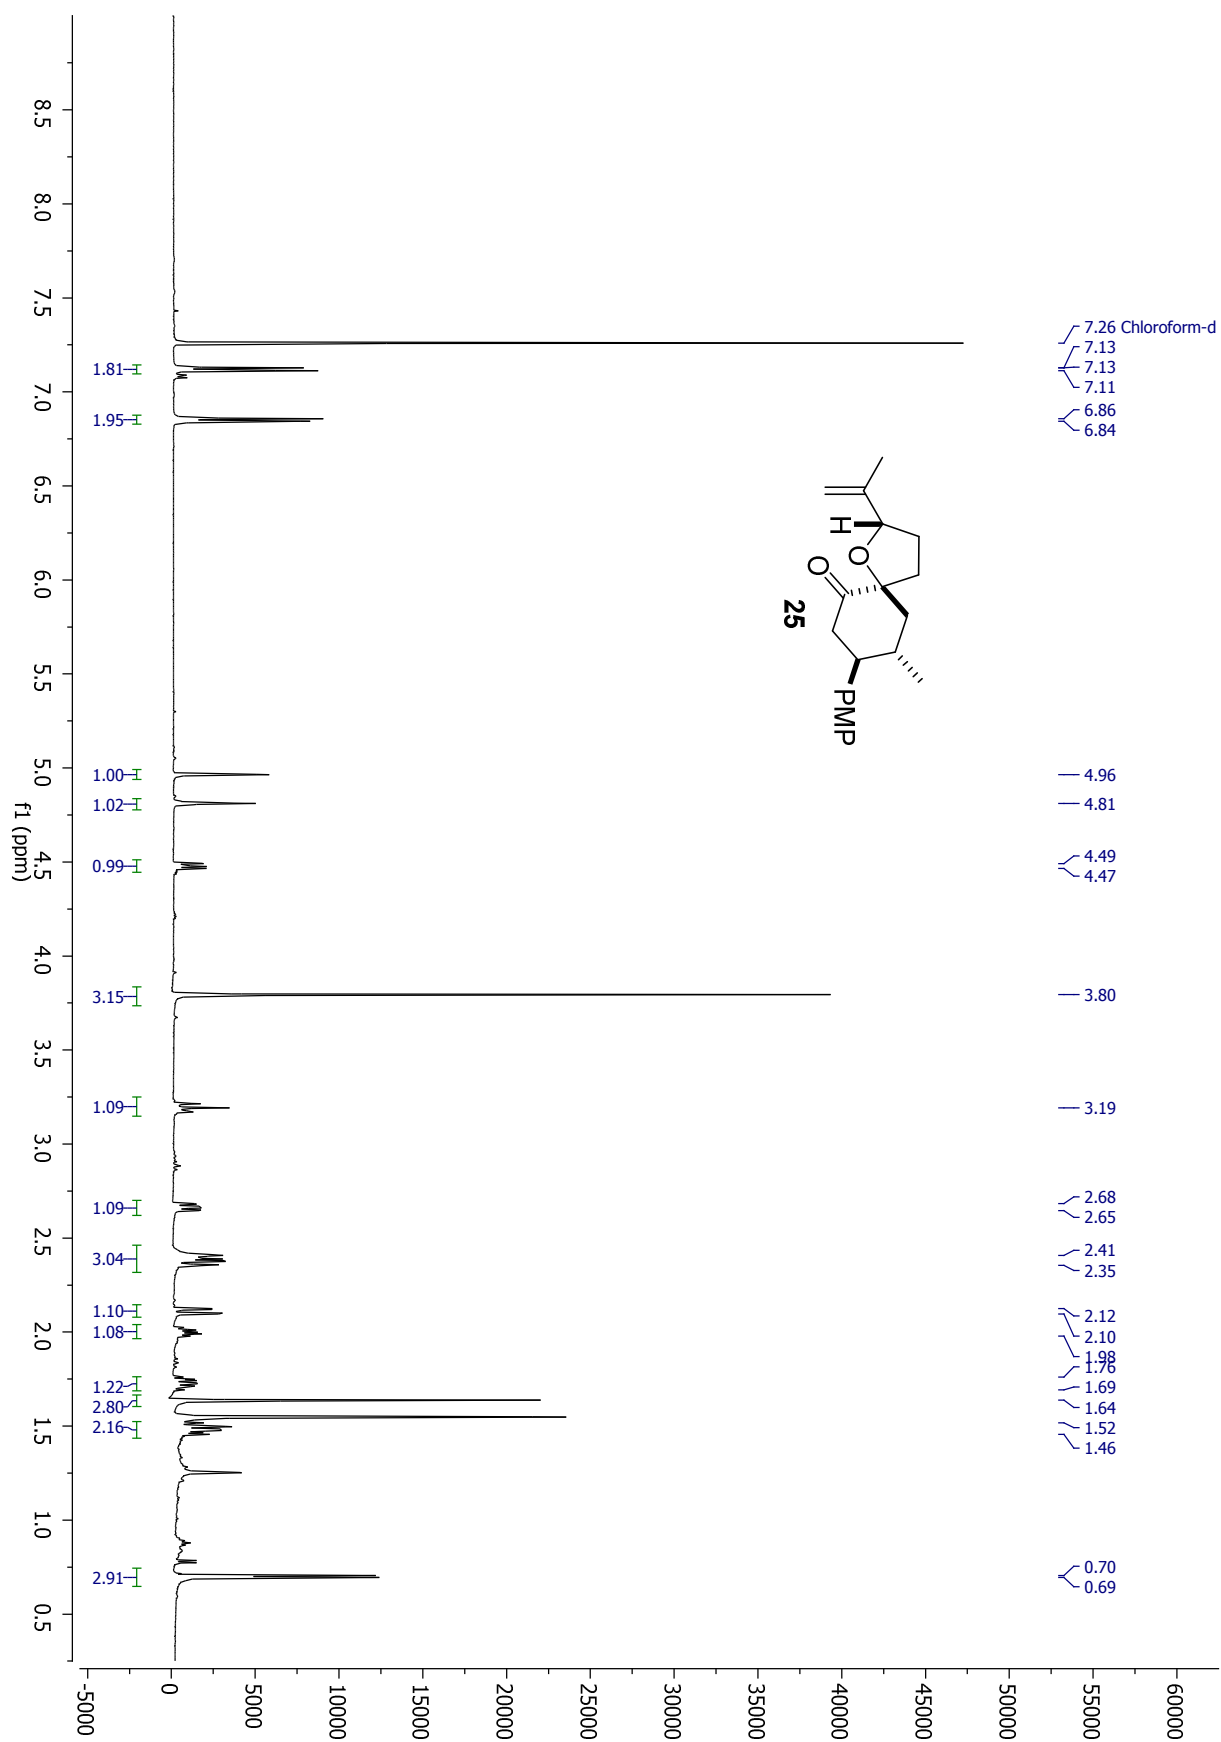

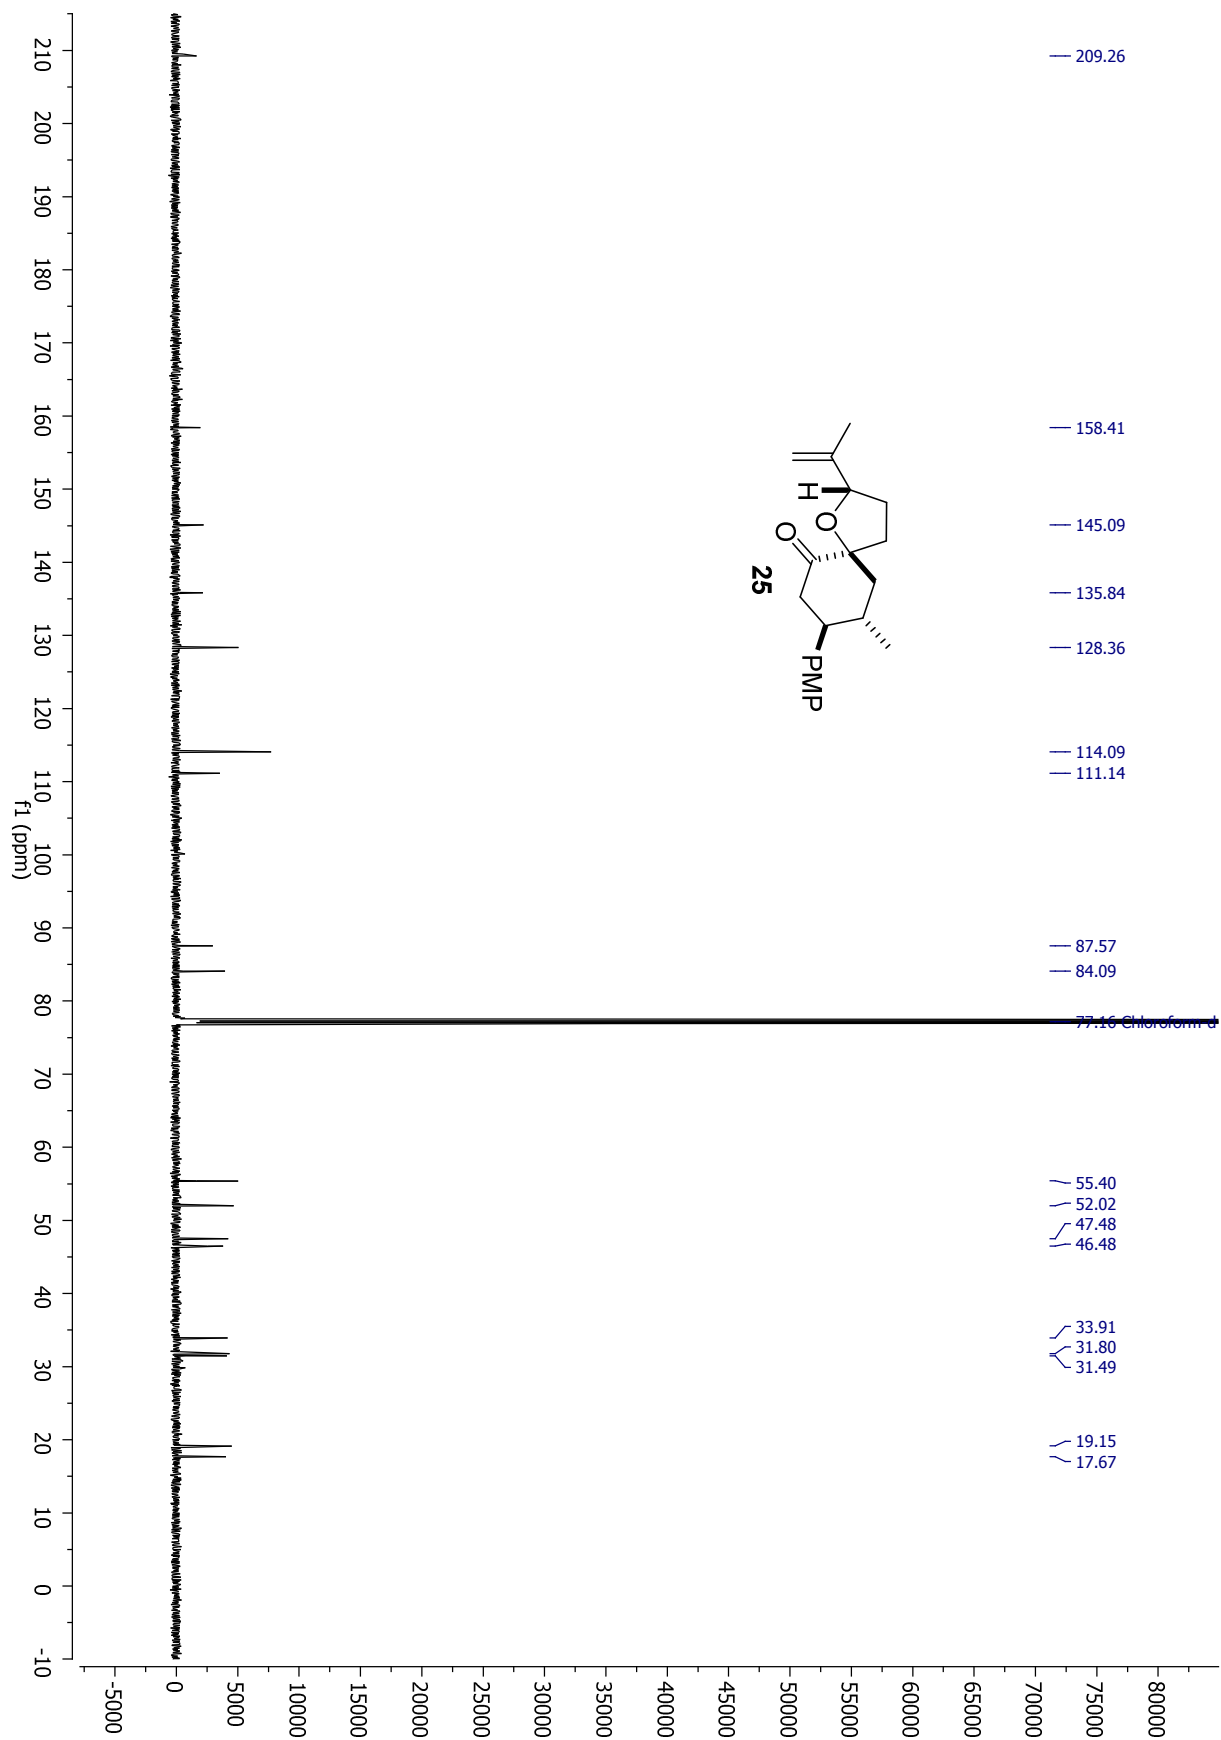

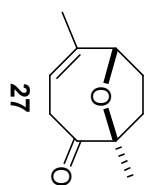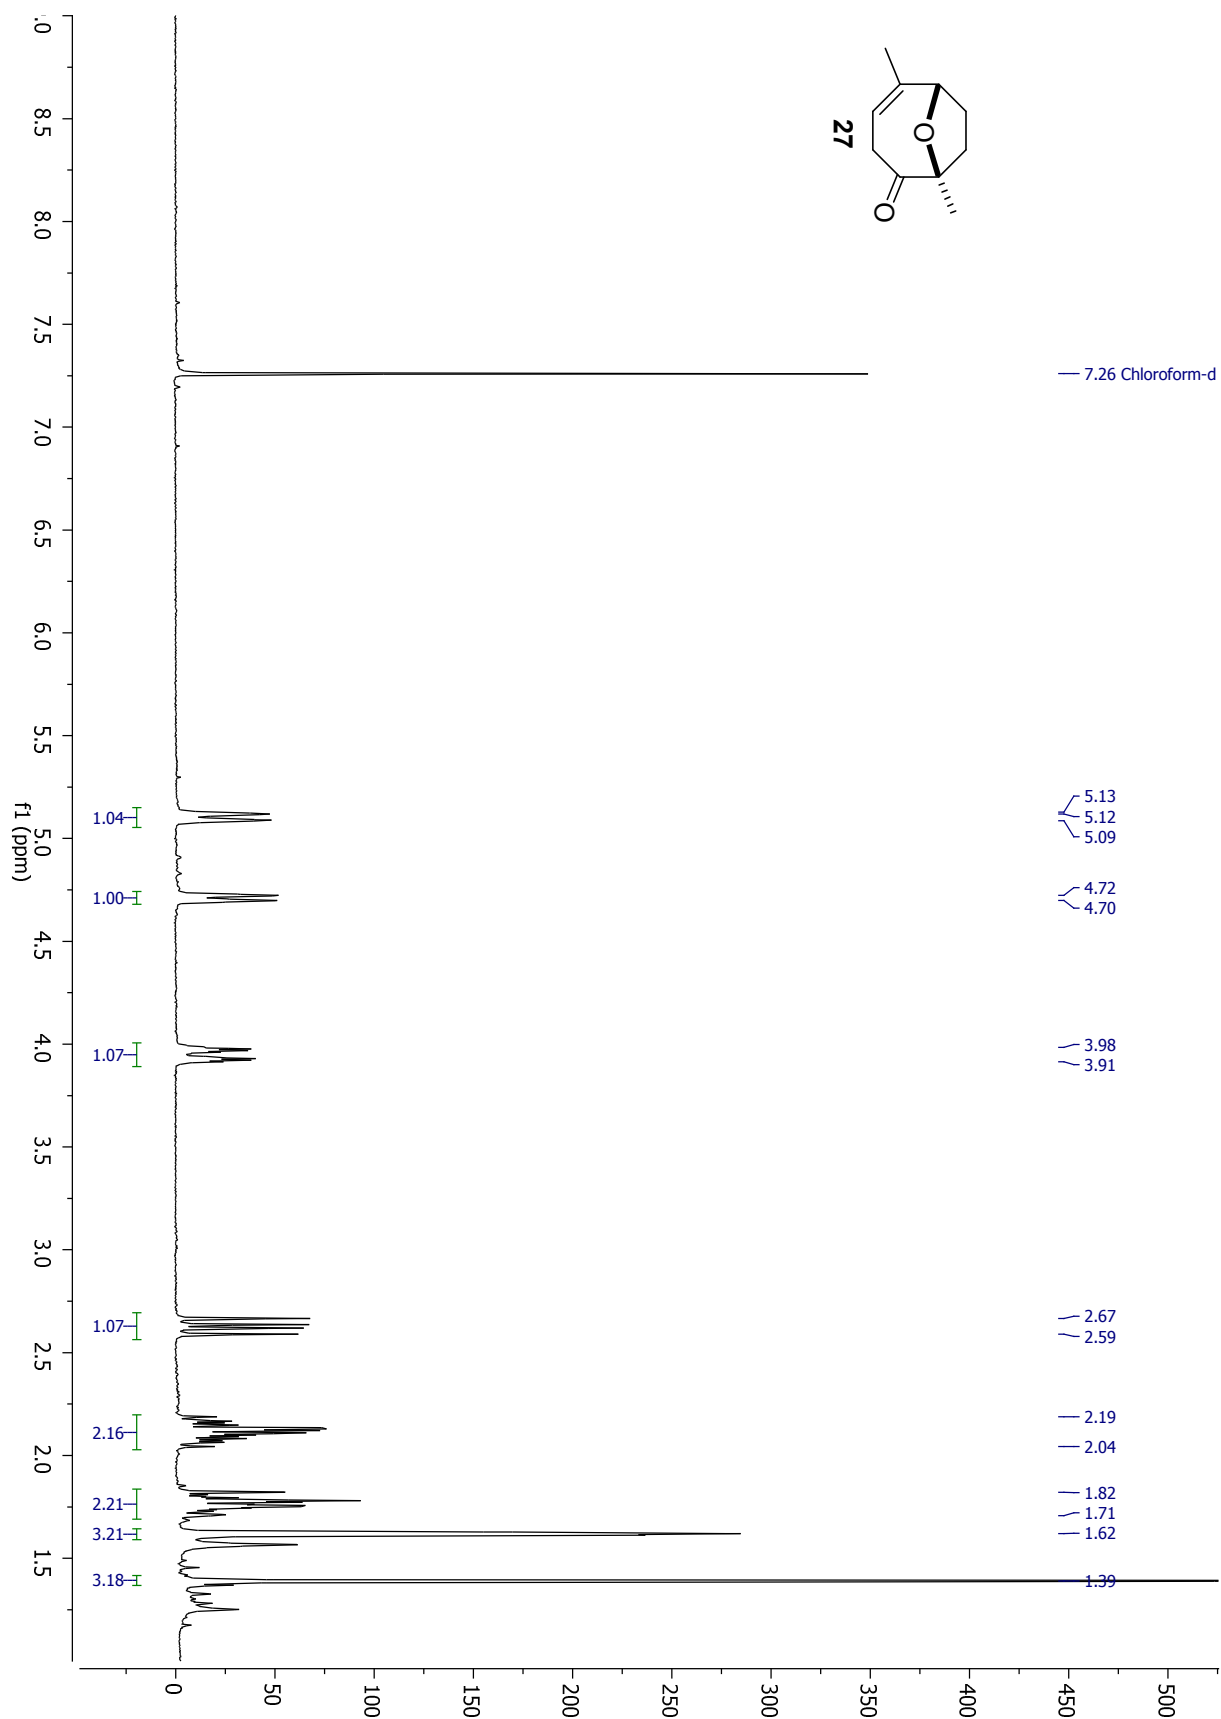



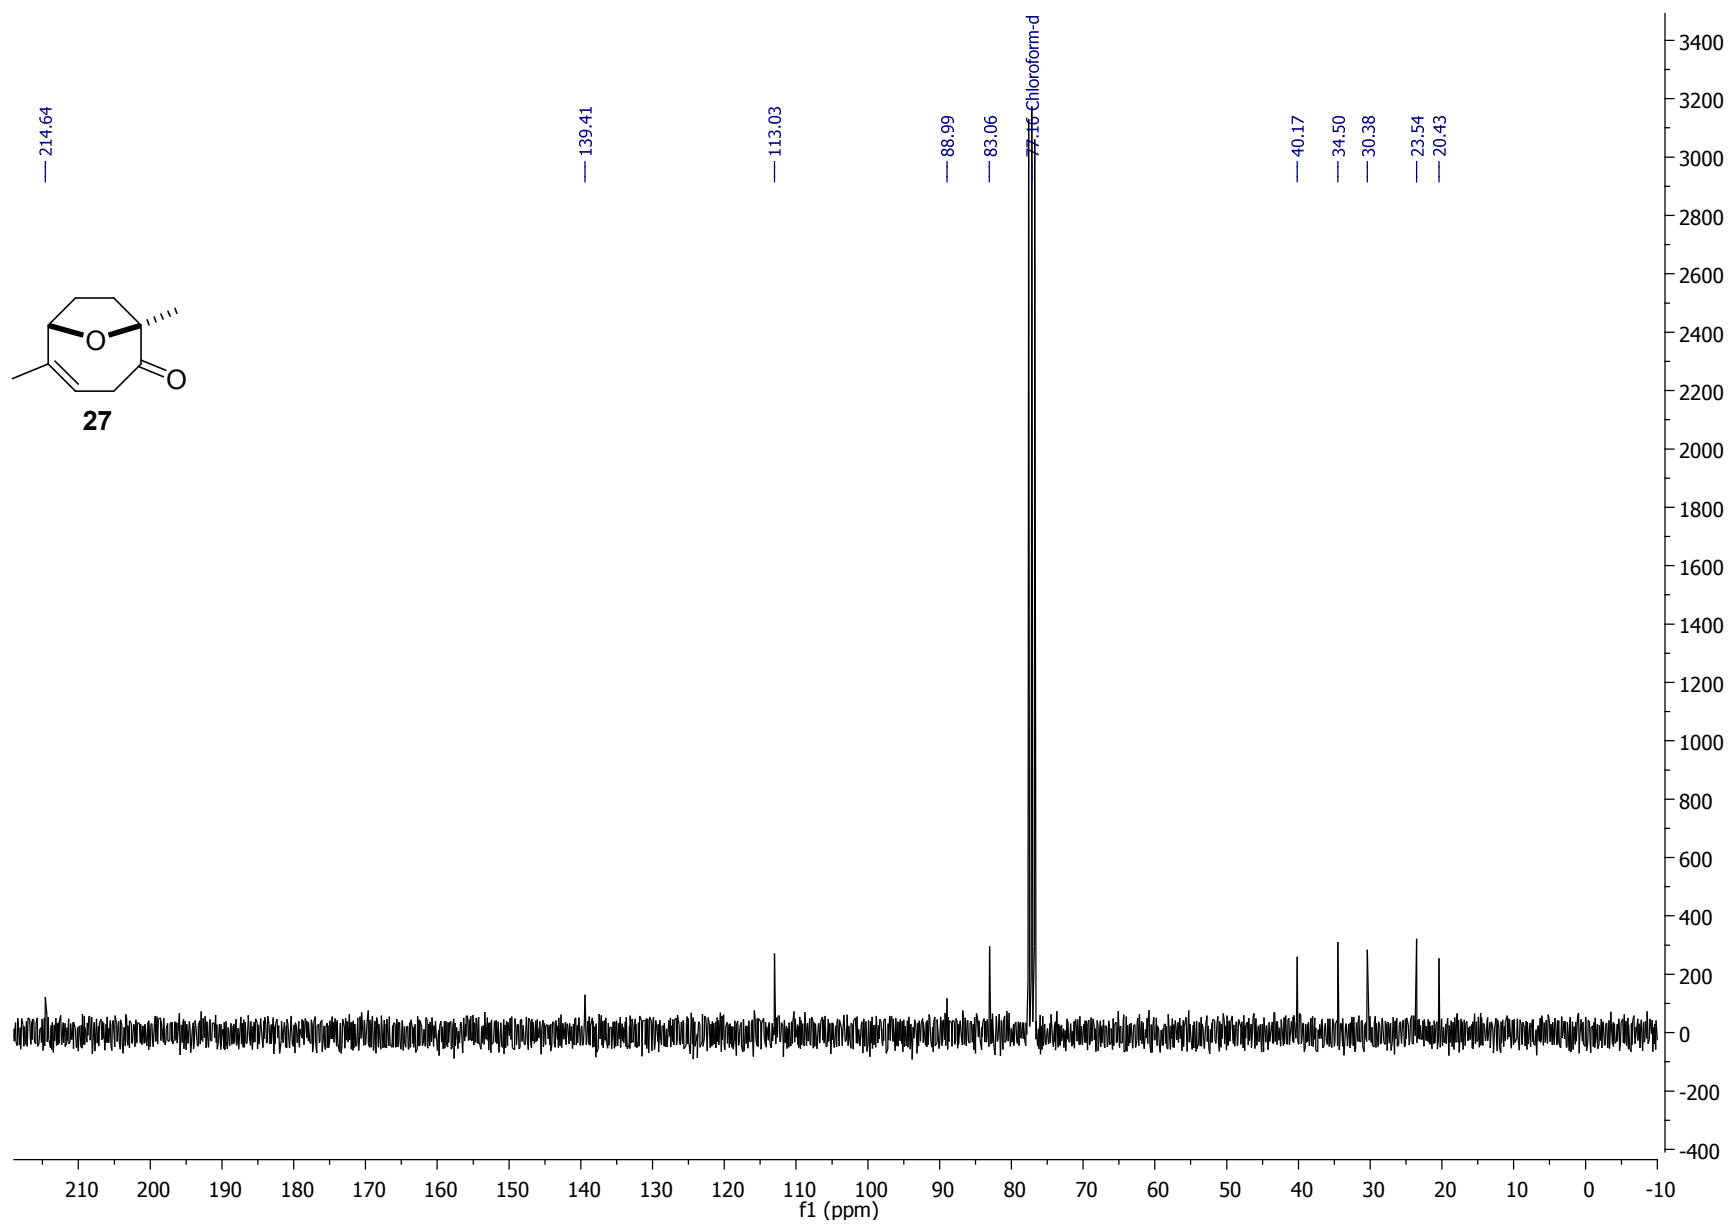

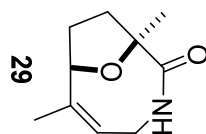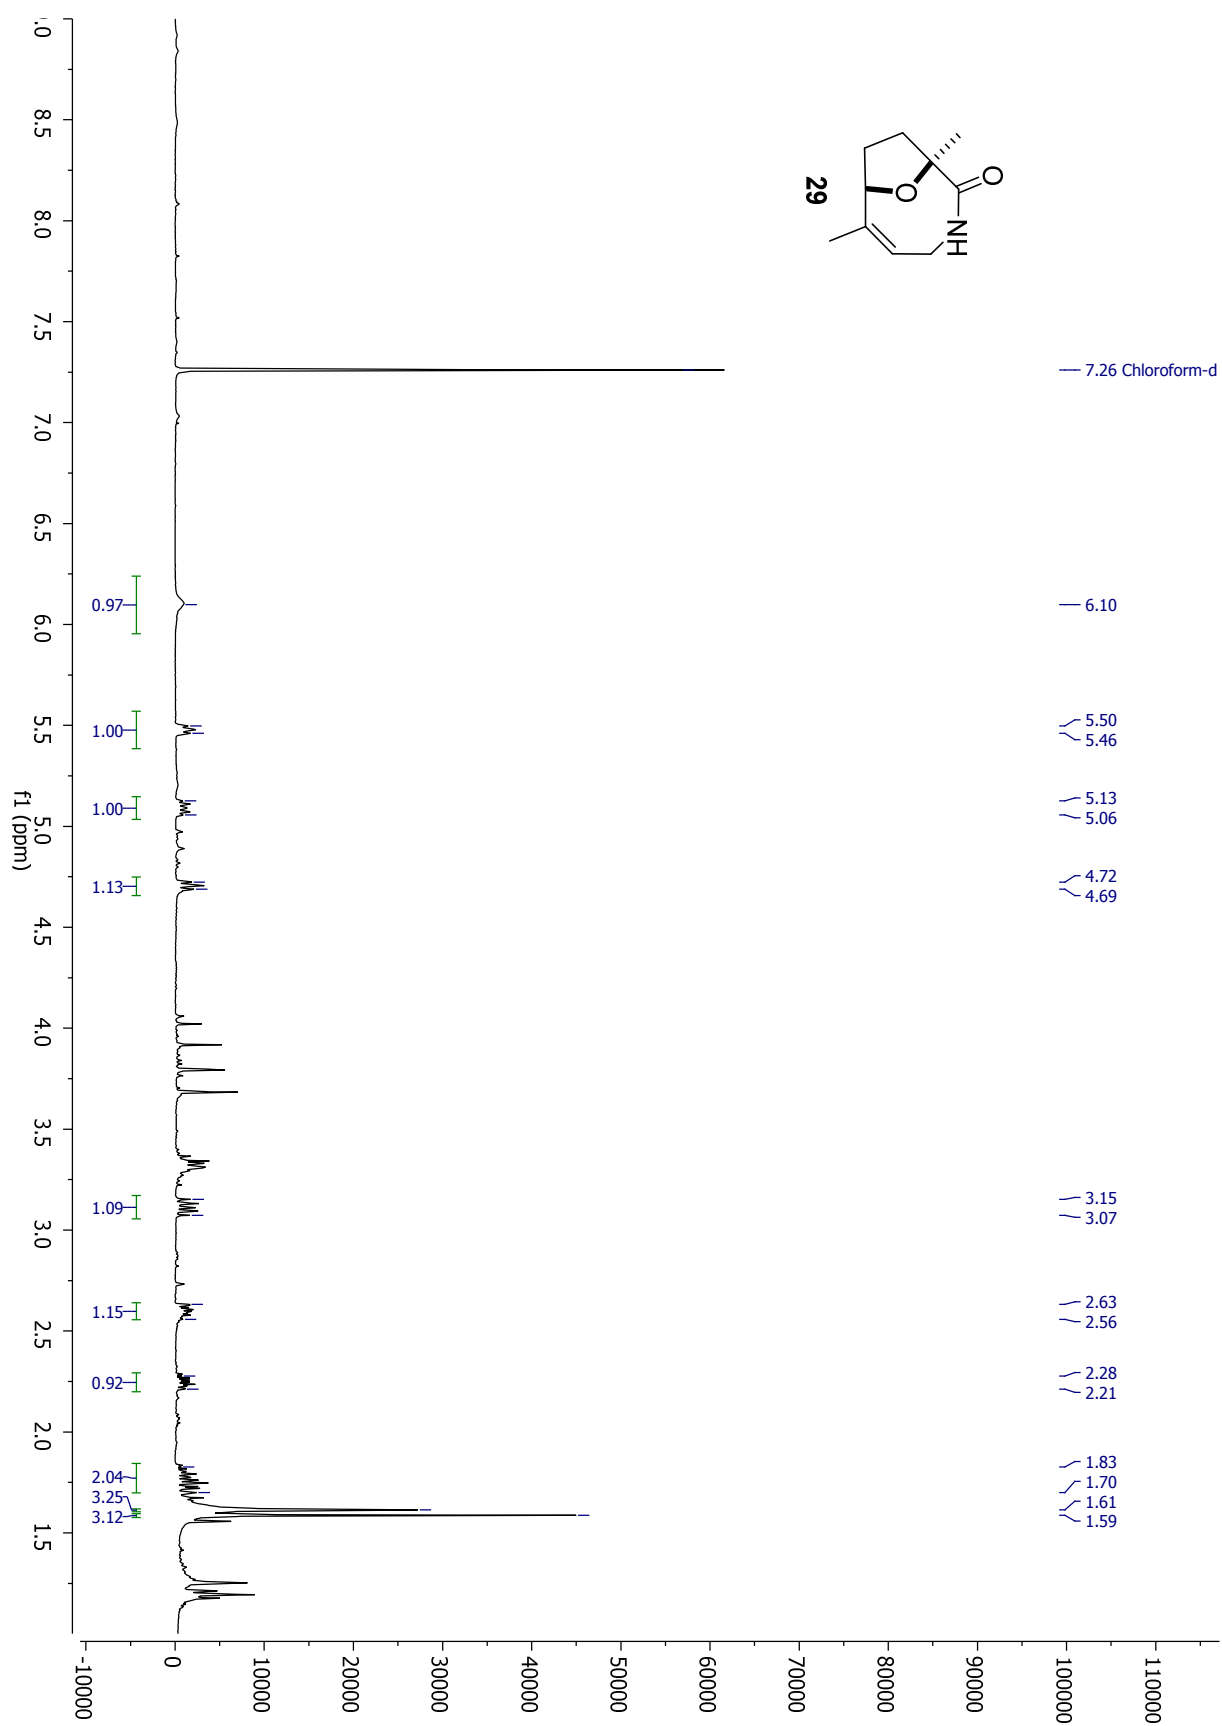

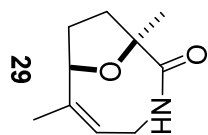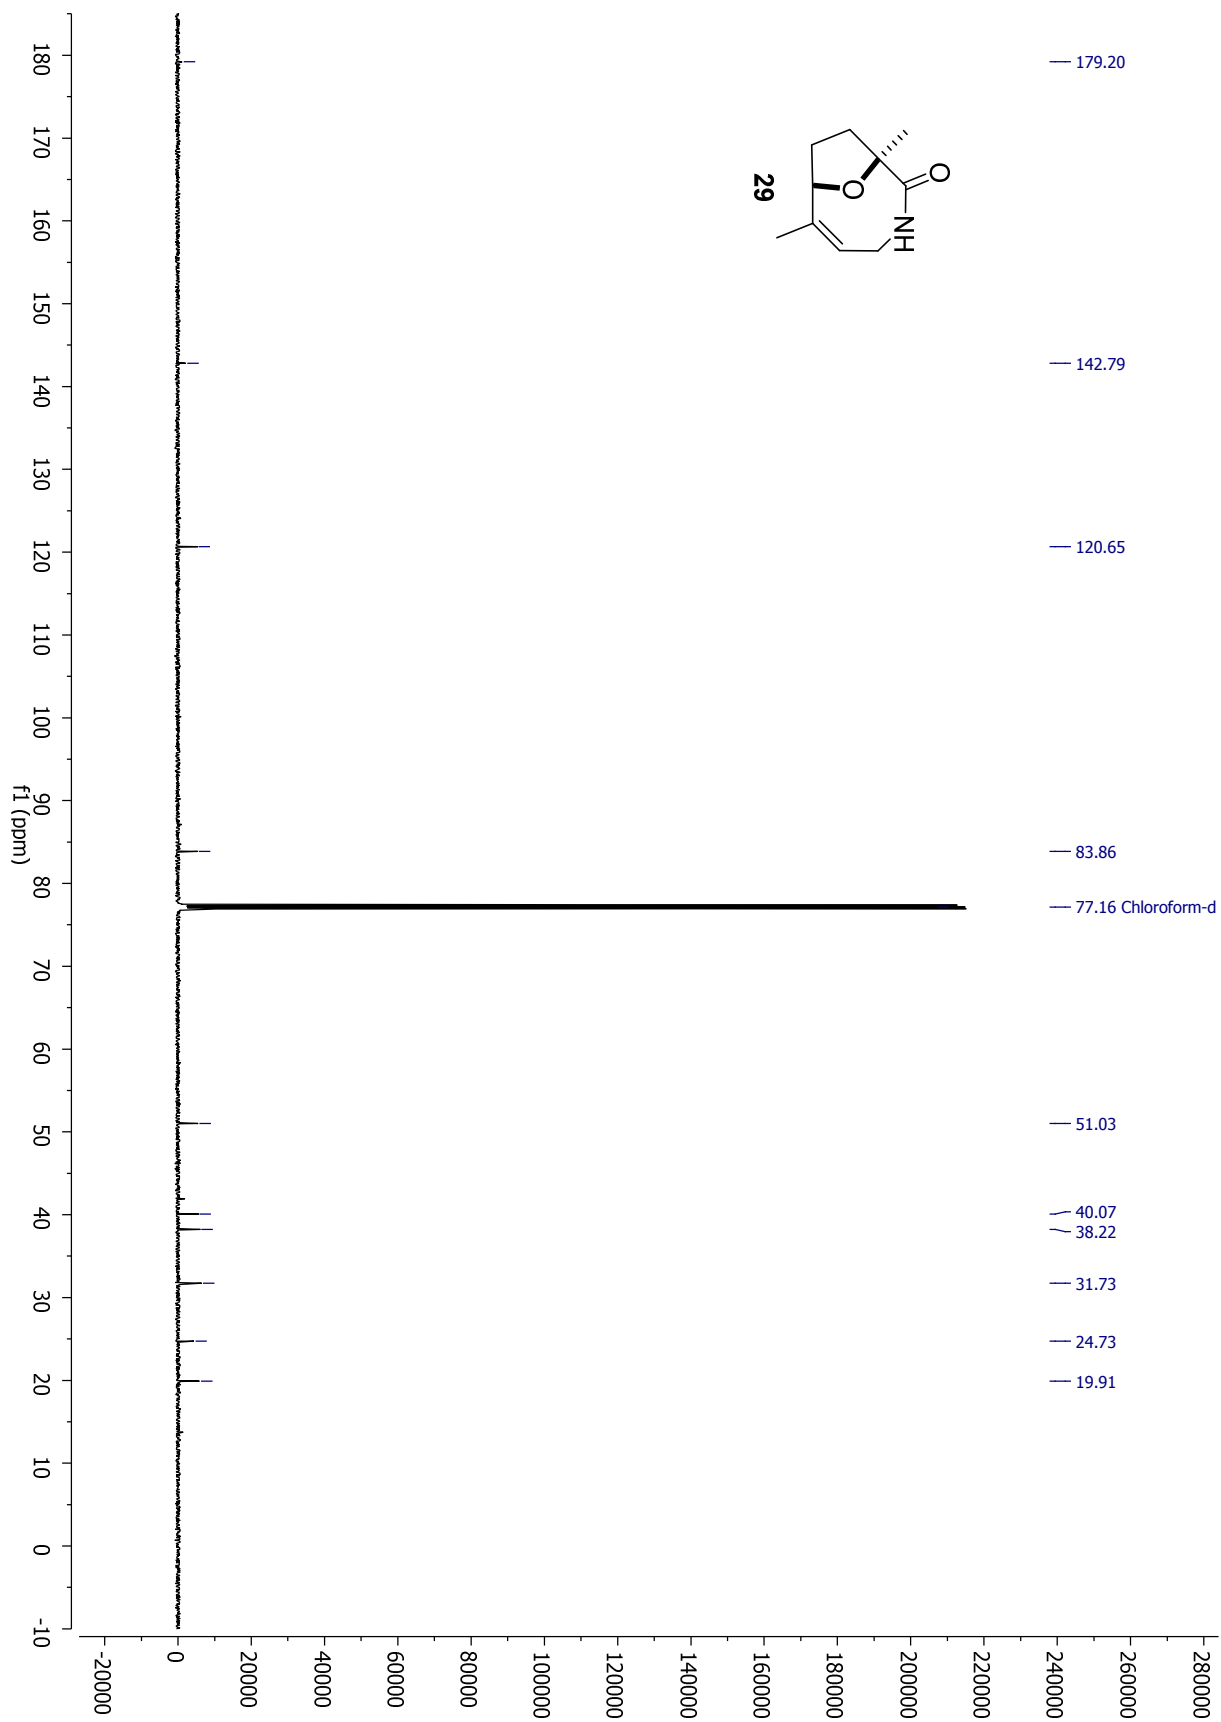

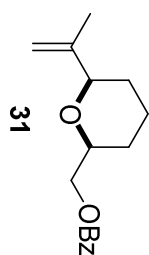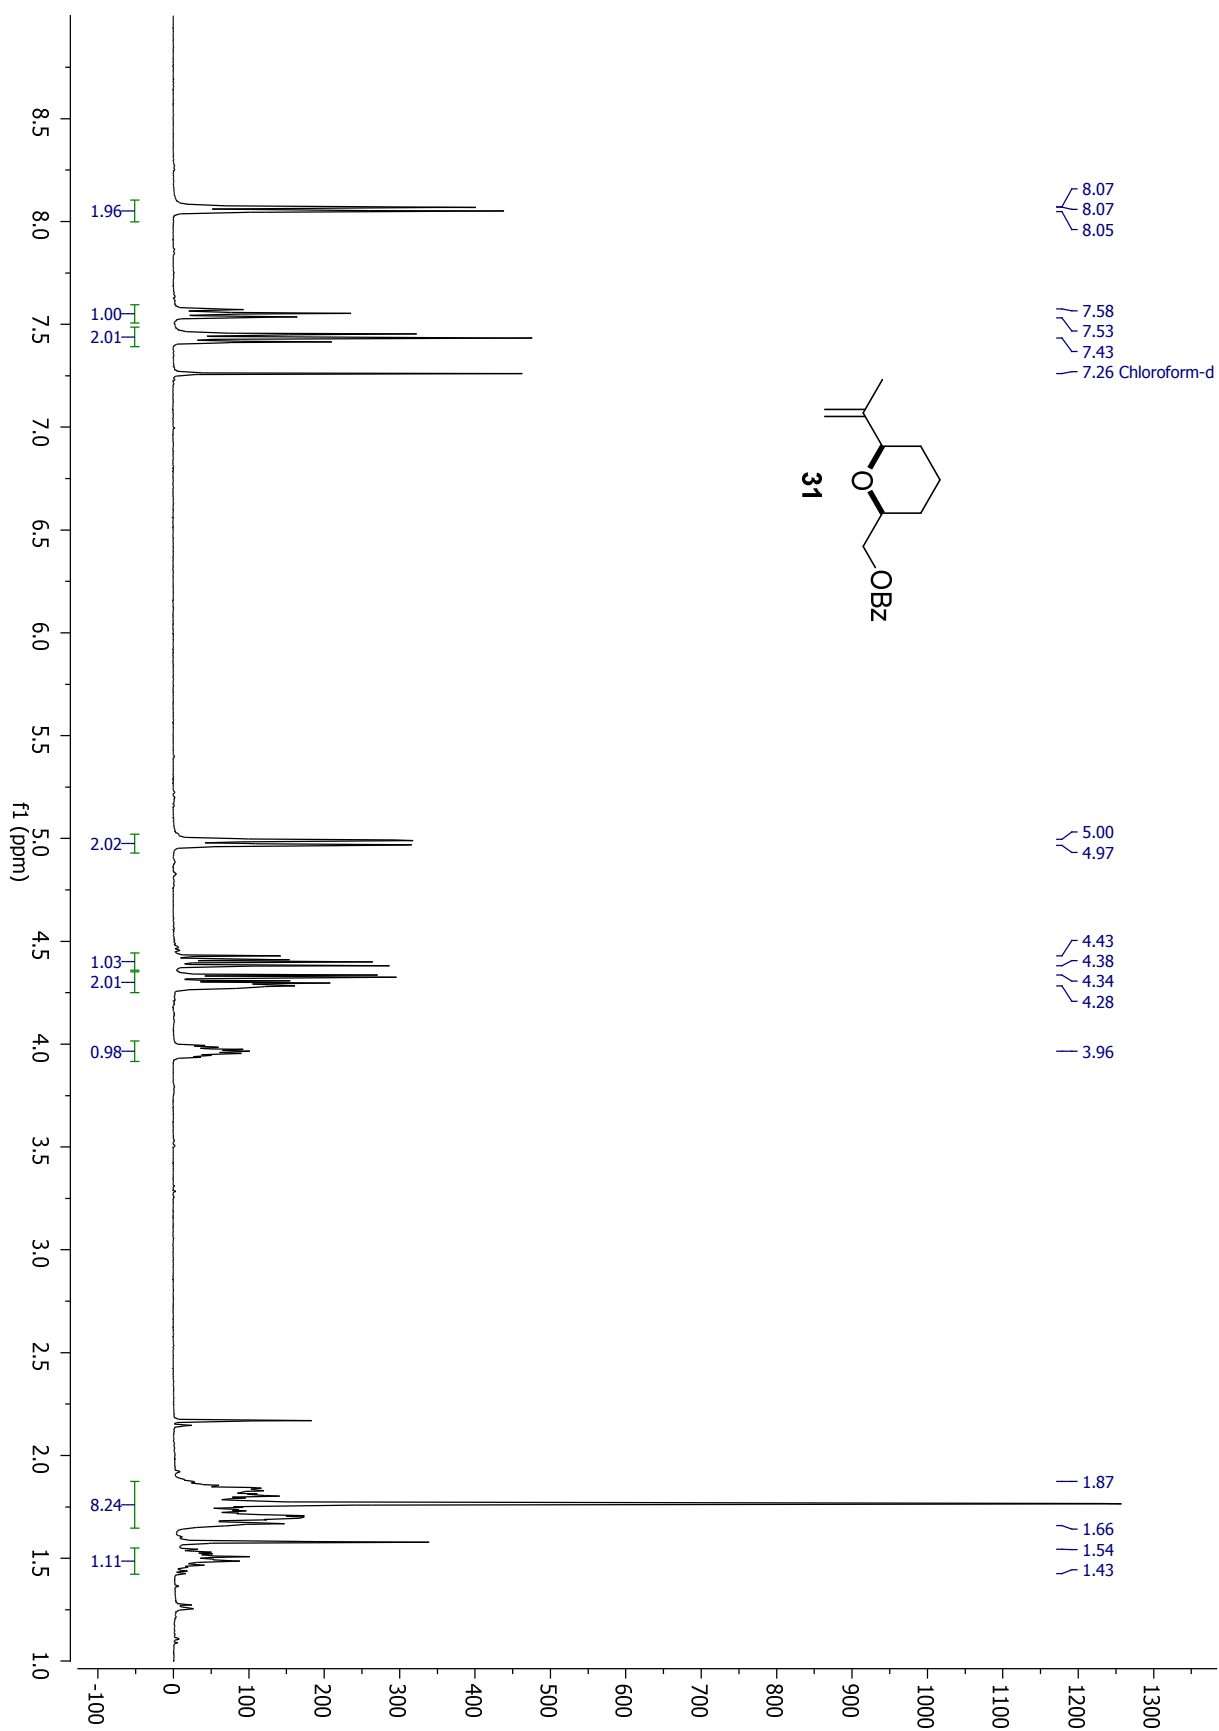

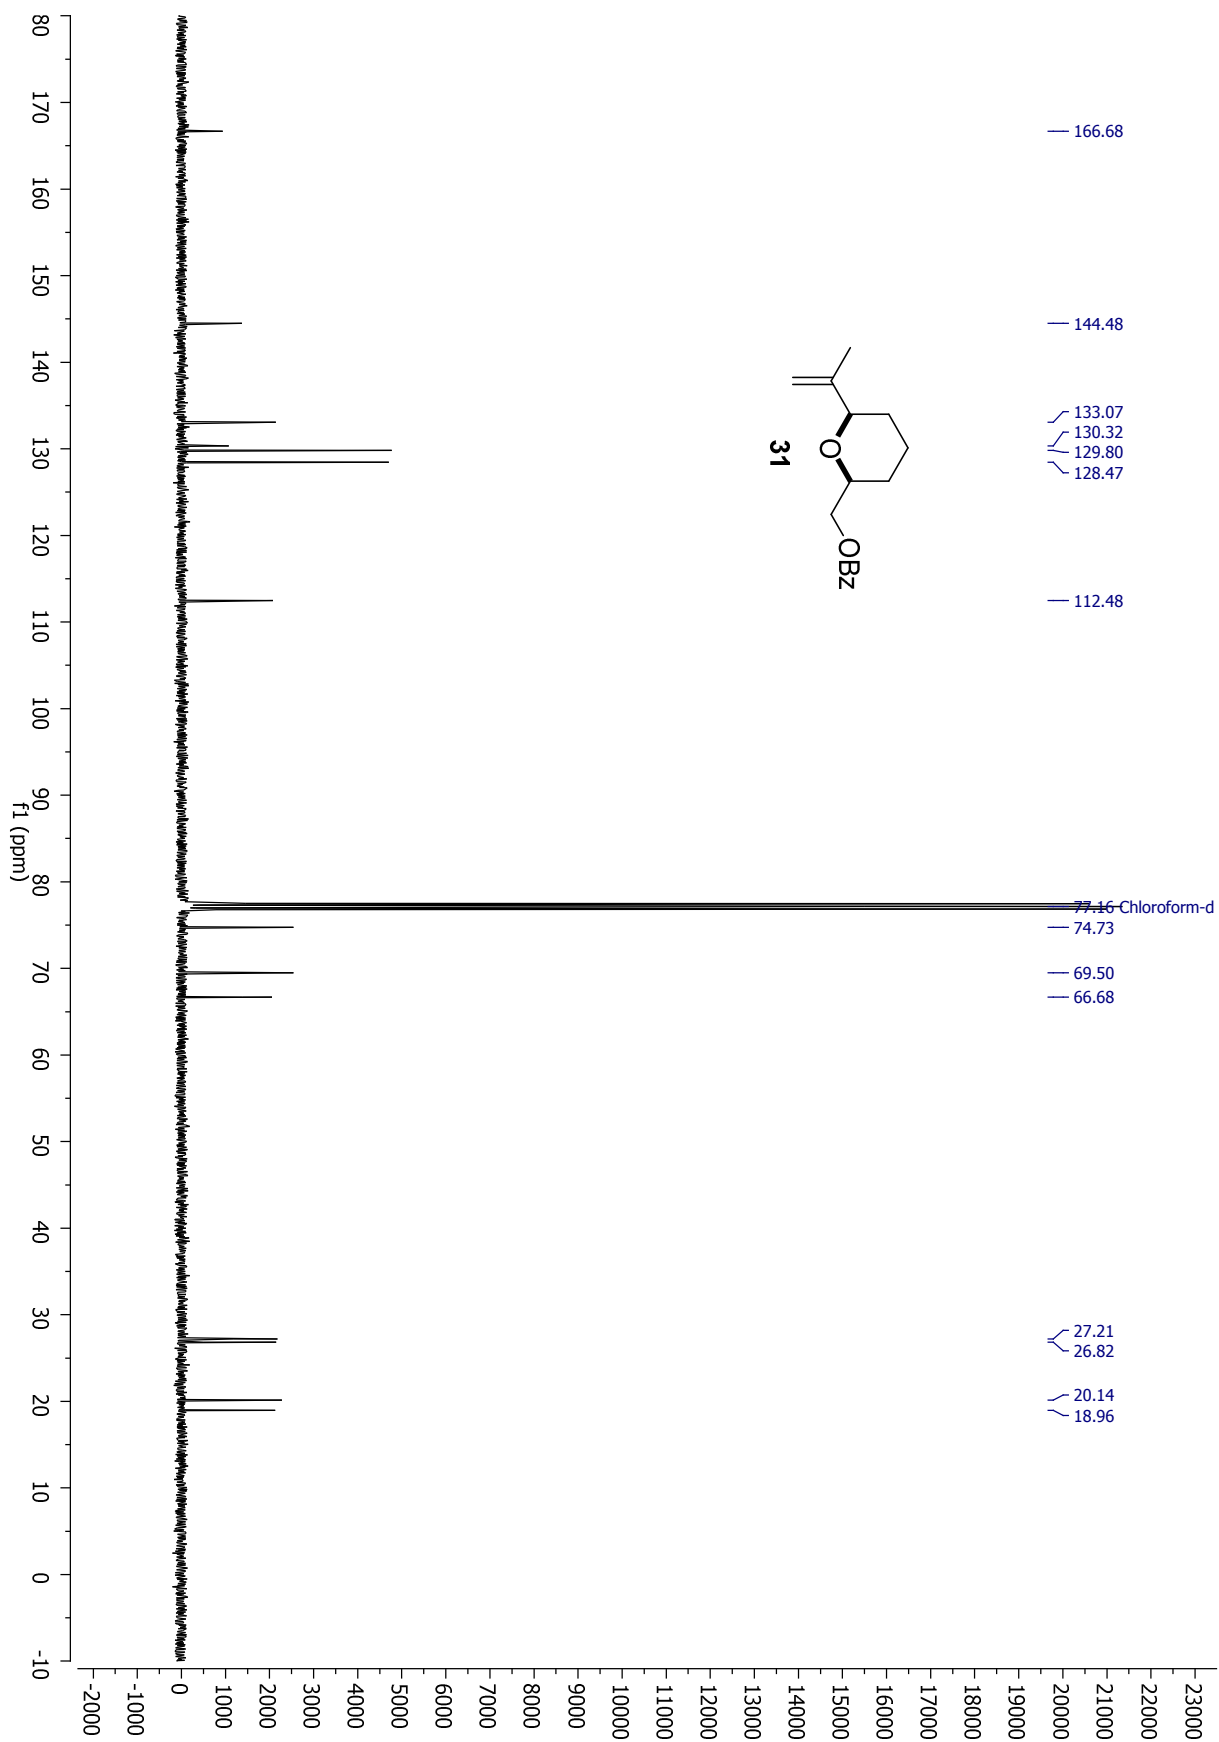

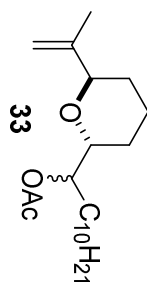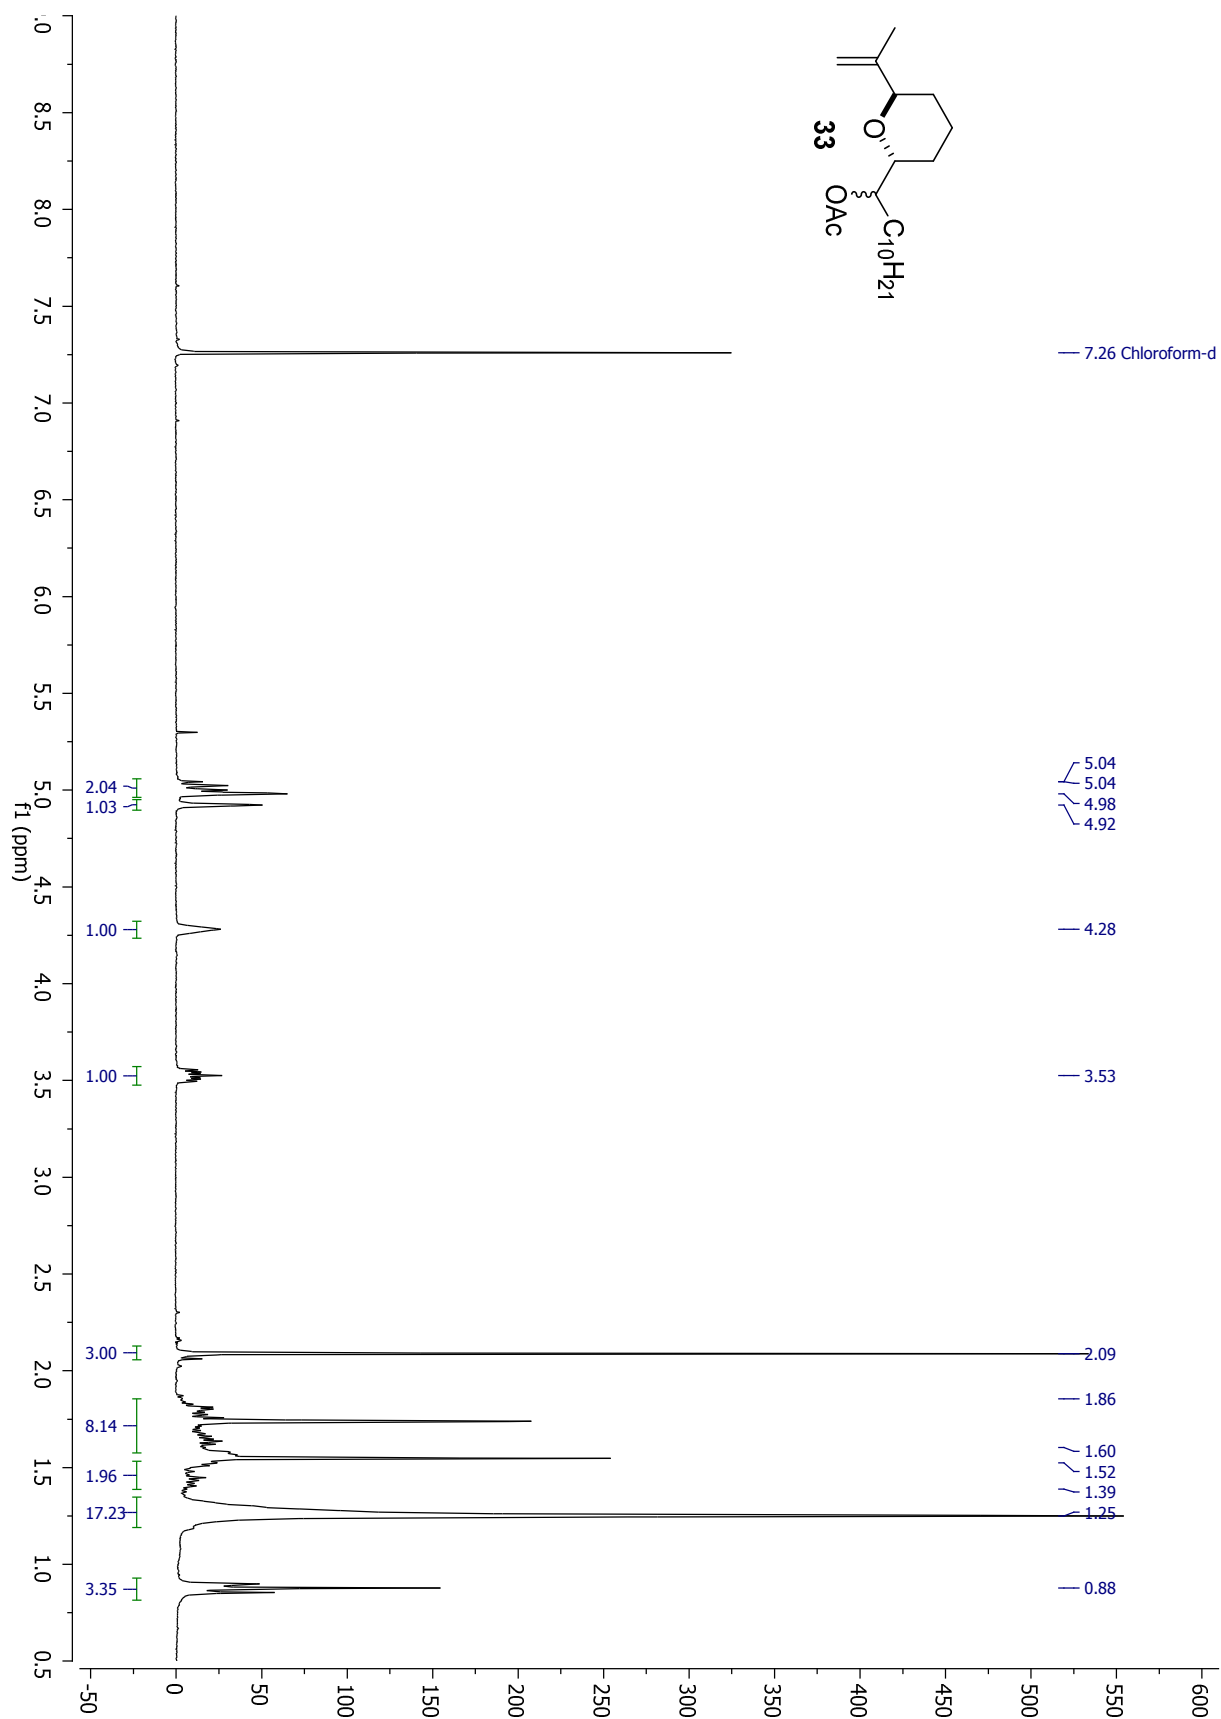

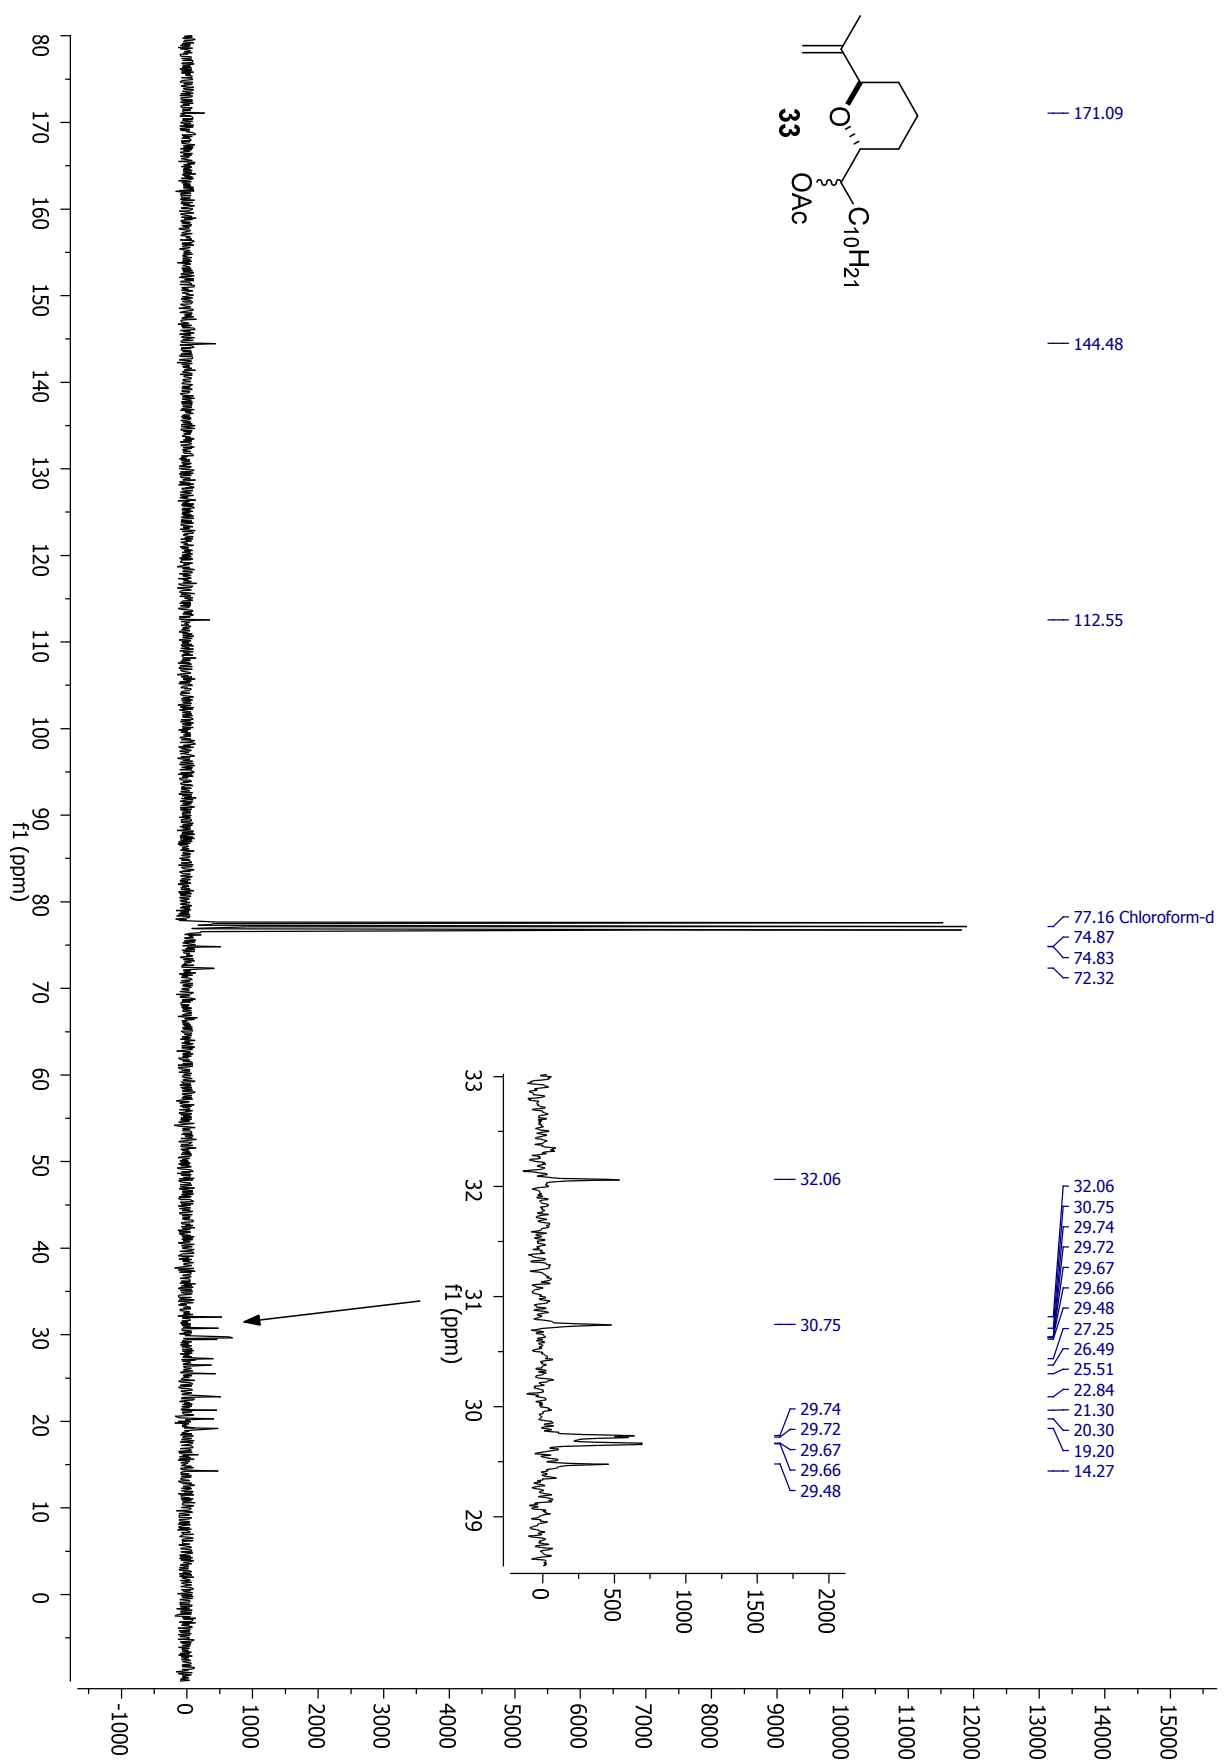

Supplement: c7ob00607a1.pdf [file c7ob00607a1.pdf]
